# Supplementary material for: Polθ inhibitors elicit BRCA-gene synthetic lethality and target PARP inhibitor resistance
Source: Nat Commun. 2021 Jun 17;12:3636. doi: 10.1038/s41467-021-23463-8 (PMC8211653; doi:10.1038/s41467-021-23463-8)
Supplement: Supplementary file 4 — Supplementary Data 1 [file 41467_2021_23463_MOESM4_ESM.xlsx]

## Sheet: Sheet2
GeneID	BRCA1 wild type viability Z score	BRCA1 wild type DE Z score ART558	BRCA1 wild type DE Z score olaparib	BRCA1-/- viability Z score	BRCA1-/- DE zscore ART558	BRCA1-/- DE zscore olaparib
AAK1	-1.55603	-6.00115	0.777875	-1.12808	-1.97306	-1.9758
AATK	0.117125	-1.4064	-1.14859	0.00155996	0.684167	0.255838
ABCE1	-5.73824	-0.354706	0.928076	-2.45564	0.935189	-0.18046
ABI1	-0.0569452	-1.93093	-1.97026	-0.268925	-1.27253	0.161863
ABL1	0.699477	0.925493	2.2491	0.341532	-2.18776	0.15831
ABL2	-4.26985	-4.79144	-5.42094	-2.51325	-0.840884	0.572633
ACKR3	-5.3598	-20.3821	-19.2263	-6.43456	-1.7604	-2.40506
ACSL3	1.15816	0.850567	-0.472168	1.1609	0.916126	1.02197
ACSL6	-0.909965	1.11225	0.979231	0.428022	-1.0733	-0.039852
ACVR1	0.145609	2.48369	1.74133	0.867141	-0.657136	-0.09501
ACVR1B	0.517043	1.06977	1.68694	1.5588	-0.622512	-0.582221
ACVR1C	-0.27405	-1.80233	0.816852	-0.00317162	-2.05167	-2.04273
ACVR2A	0.430718	-1.12323	-1.49137	0.344971	-3.17378	-2.13008
ACVR2B	0.333572	0.0116673	-1.46802	0.0532347	-1.58506	-3.14285
ACVRL1	-2.56605	-4.95309	-6.24571	-2.35967	-0.0721452	0.882658
ADCK1	1.30582	-0.537511	-3.34894	-0.136722	2.52649	2.32762
ADCK2	-3.13014	-3.81754	-0.258679	-2.0294	-0.552637	-0.371332
ADCK4	-0.296524	-0.744635	-1.3945	-0.139167	-0.860312	0.0759846
ADCK5	0.148688	-1.49519	-0.0634032	-0.820213	-1.94209	-2.92666
ADK	1.73158	-0.256816	0.760383	0.284194	-0.993989	-0.0901248
ADPGK	-0.167539	-0.532819	-1.83127	-0.814534	1.69524	2.35649
ADRBK1	-0.304928	-0.445825	-1.37973	-1.54617	0.726928	-0.29618
ADRBK2	1.16132	1.33797	0.206614	1.36271	1.39368	1.18706
AFF3	0.832857	1.79537	0.764488	1.39732	1.66687	1.37587
AGK	-0.249226	-2.94681	-4.8242	-0.026716	0.205368	-0.17868
AK1	-0.924172	0.449654	3.17635	0.220248	-0.469762	1.04972
AK2	0.719973	-0.283561	-0.030418	0.298196	-0.540795	0.854986
AK3	0.945924	0.31963	1.49525	1.32273	1.00248	1.48403
AK4	0.620334	1.71426	0.515422	-0.232882	-0.362949	-1.52757
AK5	0.890291	0.761858	0.610694	1.14397	1.42574	1.39792
AK7	2.60597	-2.08765	-3.14821	0.218797	1.73202	0.367013
AKAP9	0.469249	-0.552145	-0.605947	0.657735	-0.553241	-0.859962
AKT1	-0.0138286	2.01338	2.12415	-0.187181	-0.215149	-1.13016
AKT2	1.18996	-2.92239	-4.38043	-2.08187	-1.34219	-1.1623
AKT3	-0.613365	-1.12692	-0.0475301	-0.604753	0.860505	0.961835
ALDH18A1	0.755499	-0.207728	0.663069	0.692245	1.75943	1.668
ALDH2	-1.91917	-2.07564	0.0857426	-2.28958	0.864571	-0.448458
ALK	0.4524	1.06136	1.85008	0.993537	-0.101203	-2.20199
ALKBH2	0.744535	0.490517	-0.484535	0.235266	-0.610508	-0.249529
ALKBH3	1.32155	0.0952035	-0.0727169	1.70498	0.157967	1.15853
ALPK1	0.515402	-0.90166	-1.01191	-2.27594	0.890841	-0.9302
ALPK2	-0.520501	0.657907	1.27656	0.366392	0.707567	2.03017
ALPK3	0.0859006	0.0867265	0.815291	0.82742	-0.297979	-0.799697
AMER1	0.789672	0.597317	-0.194219	-0.693935	1.38422	1.509
AMER1	-0.72711	-1.11645	0.0630854	-0.910395	-0.0404996	-1.52416
AMHR2	0.925277	-0.656505	-1.65138	-2.21608	-1.4906	0.70709
ANAPC4	-6.21523	-5.55527	-6.44972	-4.63561	-1.22731	-1.09547
ANKK1	0.35848	-0.705648	-0.0625061	-0.345316	0.58479	0.0961687
AP3M1	0.725456	0.000562637	0.182438	0.440595	-0.327889	-0.163788
AP3M2	-8.38642	-0.977756	-1.51574	-4.08797	-0.0836784	-0.540473
APC	-1.29703	-4.45433	-1.90306	-2.45819	-0.828768	-0.099833
APEX1	1.04236	-0.287136	0.817043	1.59574	0.243202	2.77063
APEX2	-1.31235	0.0100729	-3.59341	-0.629289	1.07787	3.21317
APEX2	-3.29282	-2.02874	0.195288	-1.60535	-2.11773	-0.910466
APTX	0.117173	0.0975311	0.678582	0.79665	0.320675	0.819603
ARAF	0.00454395	-0.314355	-0.638365	0.242143	-0.698574	-0.638628
ARHGAP26	-0.103249	-3.33138	-0.923328	-0.689204	-4.3246	-2.31294
ARHGEF12	-1.74353	-9.65232	-7.1533	-2.18156	-0.971659	-1.88694
ARID1A	0.325323	-0.449481	0.489911	-0.378745	-1.88457	-1.50471
ARID2	0.815044	1.70313	1.15331	1.19934	0.0965825	-0.761335
ARNT	0.421546	1.08861	0.909406	-1.3473	1.13187	0.63809
ASB6	1.30255	0.322618	0.617212	0.925659	-0.63845	0.733673
ASB7	1.00343	-0.532653	-0.550638	-0.0264068	-1.53698	-0.613938
ASPSCR1	0.937851	0.935123	0.125771	0.921889	-0.824628	-0.922038
ASXL1	0.647015	1.26606	0.247511	0.980308	0.141708	-1.44757
ATF1	0.0362842	1.60875	1.20584	0.800924	1.1102	1.16352
ATM	-0.20729	-1.10359	-2.91853	-1.71092	2.19953	1.16118
ATM	0.260596	-1.05973	-0.724465	-0.988762	0.523461	0.673078
ATM	-0.305374	-0.448719	0.0159499	-0.390519	-0.826577	-1.38443
ATR	-0.900985	-1.10806	1.5806	-1.19836	0.837966	-1.04734
ATR	-1.43522	0.141162	0.727466	-1.45886	-1.62449	-3.65796
ATRIP	0.860671	-0.27602	0.0582237	0.325346	-0.231244	-2.04224
ATRX	0.0497707	1.32044	0.55044	0.271296	1.18346	-0.308285
ATXN2	-3.52716	-0.276746	0.844905	-1.67407	0.289652	0.18285
AURKA	-8.23255	-0.999033	2.13373	-3.95946	-1.66941	-0.461591
AURKB	-7.21372	2.636	6.66215	-2.34046	-2.62825	-1.75275
AURKC	-6.21694	-8.17113	-1.98602	-4.38502	-1.47987	-0.659703
AXIN1	0.798945	-0.405451	-1.11906	0.921638	0.642995	-0.476809
AXL	0.731264	2.88289	0.753546	1.09436	2.59668	2.36577
BAP1	0.155704	3.14147	1.66579	1.79917	1.8689	1.81728
BCKDK	-2.07836	-2.7053	-0.887954	-2.8547	0.793861	1.03497
BCL10	-1.81704	-11.5613	-3.68064	-2.40169	-3.719	-2.75347
BCL11A	-0.0289934	-3.30441	-1.30163	0.120627	-1.78946	-0.102798
BCL2	-0.678398	0.0425036	0.96988	-0.857451	0.882817	2.9482
BCL3	-0.489525	1.50722	1.59986	-1.16512	-0.508865	1.41503
BCL6	-0.51087	2.16596	2.00718	-0.210644	1.03786	-0.154441
BCL7A	-0.184983	2.07275	1.37985	0.407242	0.737595	0.387866
BCL9	-2.59426	1.98273	2.29345	-0.810565	1.57882	1.29292
BCOR	1.33024	1.0916	0.411737	0.639076	-0.448371	0.831118
BCR	-1.91769	-3.08056	-4.66733	-2.6313	0.0898481	0.826811
BIRC3	-0.137002	1.50931	1.00841	0.534421	1.82419	1.91037
BLK	2.41795	1.59655	-0.0358376	1.18312	0.548117	-1.05278
BLM	1.58839	-0.288361	-0.378053	1.43505	-0.196931	1.579
BLM	-0.689074	0.362748	1.69629	0.270386	0.173672	1.4075
BLM	0.560542	0.476203	1.26625	0.312042	-0.102235	-0.586252
BLNK	-6.60741	-8.2054	-12.1362	-2.8572	-2.79721	-3.31243
BMP2K	2.7863	2.25264	-2.54635	2.27459	1.69992	1.62102
BMPR1A	0.381014	0.992684	1.68476	0.676738	2.27177	2.03896
BMPR1A	2.42227	-0.472963	-0.911839	2.18317	0.156807	1.72443
BMPR1B	2.65327	2.27596	-1.04008	1.56585	0.63776	-0.609052
BMPR2	0.942595	0.290401	-0.829541	-0.142373	0.371555	-1.00255
BMX	1.26986	0.524834	-0.87606	1.47572	0.705973	0.116957
BRAF	-2.9393	-1.32085	0.517465	-3.89391	-0.0864417	0.78391
BRCA1	-1.58664	-2.47538	-10.1976	-0.293513	-0.482632	-0.311823
BRCA2	1.35672	-1.84744	-10.4799	-0.148433	-1.37681	0.056126
BRD2	1.72019	1.65842	0.55002	1.45152	1.5328	1.50845
BRD3	1.04205	-2.12521	-3.77585	0.132415	-1.54046	-0.00908066
BRD4	-2.94938	-8.85526	-2.6608	-4.0886	-3.36455	-2.7133
BRDT	0.271384	1.2342	1.34656	0.469478	-1.08243	-1.44686
BRDT	1.09677	0.757579	0.819485	0.985435	-0.921246	-1.51628
BRIP1	1.6001	0.603538	0.54328	1.49427	1.11721	2.62176
BRIP1	1.21936	0.0356458	1.13052	1.70719	-0.257249	0.915312
BRSK1	1.74135	0.682147	-1.81216	0.426844	0.714569	0.632691
BRSK2	0.999064	1.81579	1.04367	1.36271	1.26383	0.638832
BTAF1	-0.267602	-2.16569	0.747915	-0.247248	-1.60385	-1.35345
BTK	-0.962521	-0.229652	2.33625	0.053302	-0.430404	-0.560802
BUB1	1.52842	0.0089092	-2.27753	0.847952	1.1287	0.748593
BUB1B	0.604471	0.1702	-0.75453	0.200776	0.830564	1.25719
BUB1B	0.169488	0.233541	0.161263	0.0995423	1.13625	0.458494
C15orf65	-0.485408	-2.14492	1.66468	-0.325555	-6.24231	-1.93237
C2orf44	-0.715249	1.34269	0.740971	0.219667	0.169123	0.112625
C8orf34	1.73963	-0.293639	-0.607749	0.925486	0.0348461	0.380773
CALM1	-0.951851	0.806144	1.93587	0.342768	-0.741254	-0.876846
CALM2	-4.97324	2.37871	-0.326442	-5.34856	-4.89642	-2.53101
CALM3	-1.01553	0.739406	3.16953	-0.195923	-1.97563	-1.12938
CAMK1	-4.93249	-0.606286	6.9697	-0.861726	-1.16674	-1.05951
CAMK1D	-0.229872	-1.06237	1.41852	-0.0951239	0.805611	0.685485
CAMK1G	1.06609	1.73814	-0.518845	0.650725	0.612735	2.32597
CAMK2A	0.675486	0.279753	1.48475	0.790172	1.44483	1.38117
CAMK2B	-0.425491	0.41824	1.17198	-0.675311	-5.37993	-5.38898
CAMK2D	0.963722	0.819268	0.193228	1.71732	-0.427864	1.3717
CAMK2G	1.76747	0.429414	-0.966212	0.483142	1.19633	0.843466
CAMK2N1	-1.64256	-1.2219	-0.0537406	-1.00554	-1.02459	-0.199465
CAMK4	0.288711	-0.288745	-0.215585	0.817148	-1.35531	0.333412
CAMKK1	1.45459	0.685539	-0.328345	1.20815	-0.731298	1.33944
CAMKK2	3.27403	-0.244104	-0.392818	2.37433	2.27258	2.14038
CAMKV	0.463636	-1.06394	2.17596	0.701664	-1.06141	-1.3258
CAMTA1	-0.649656	-0.735079	1.21067	-0.561121	-1.69005	-0.419206
CANT1	-1.00907	1.11737	1.27091	-0.0846087	-0.78664	-0.312776
CARD11	0.0334919	-1.3168	-0.101938	-0.618135	-3.34702	-3.77297
CASK	-1.8704	-3.67607	0.711602	-1.16133	-1.4505	-0.329725
CBL	-0.716863	0.354477	0.783483	-0.258465	-0.424231	1.64258
CBLB	-1.98139	-9.8661	-2.83533	-4.77463	-1.49157	-0.53165
CBLC	1.04898	-5.37472	-0.347782	0.825212	-8.30898	-4.7619
CC2D1A	1.59849	-0.0376337	-1.53209	1.17635	1.00755	0.619054
CC2D1B	1.14743	-0.0607243	0.0436645	0.439935	-0.444429	-0.600524
CCDC6	-0.522805	-13.2266	-4.26584	-4.20507	-2.68295	-1.77953
CCNB1IP1	1.27169	1.7952	2.0152	1.63598	-1.47486	0.665434
CCND1	-4.69281	-2.08555	-2.12097	-2.91484	1.73081	2.18898
CCND2	-0.313926	-2.29503	-1.74584	-0.899468	1.10255	-0.500803
CCND3	0.0449584	-0.449302	-1.38826	-1.07257	0.820378	0.594474
CCNE1	-0.988771	0.0628844	0.418307	0.0574042	1.32955	1.03573
CCNH	0.942345	0.409258	-0.550234	1.20703	2.68572	2.07822
CCNL1	-4.98644	-6.39487	-5.30004	-4.65155	-0.16864	-1.14642
CD74	0.642453	0.906692	-1.03418	0.391154	0.911358	0.737964
CDADC1	-5.67761	3.56785	4.32446	-2.13746	-0.351059	0.794216
CDC42BPA	-3.36812	0.855382	3.45211	-2.24496	-2.43675	-1.45689
CDC42BPB	1.53446	2.13606	-1.02914	1.68177	1.95502	2.17339
CDC42BPG	1.46843	2.37517	-0.604388	0.857593	1.53641	0.497479
CDC7	0.429863	-2.23189	-2.53624	-1.4581	0.510063	0.020591
CDC73	-2.87295	-0.368225	1.42755	-0.718446	1.86224	3.36939
CDH1	-0.295562	0.375626	-0.0569611	-0.416499	-0.646239	-0.281225
CDH11	0.151017	1.35517	1.31815	0.180866	0.202732	1.79229
CDK1	-4.72835	-1.02586	-2.32453	-2.39592	0.291744	2.09816
CDK10	1.65847	0.159703	-0.0379786	0.598403	-1.09364	-3.21
CDK11A	-7.27079	-7.58586	0.813689	-4.54726	-1.83052	-1.37634
CDK11B	-5.92842	-1.06373	2.34521	-1.26371	-3.05541	-2.97086
CDK12	1.38686	1.01594	0.741684	1.13612	1.21977	1.56035
CDK12	1.12378	1.10441	-0.194962	1.06267	1.67913	0.718236
CDK13	1.44739	0.38885	1.86208	1.1049	0.674702	-0.124134
CDK14	-3.49442	-10.2181	-15.9888	-5.22953	-0.0645802	-0.184117
CDK15	-1.20643	0.0182377	-3.02006	-0.559139	0.573847	0.937698
CDK16	0.389955	0.603394	0.50029	0.28212	1.50708	1.62578
CDK17	0.0433892	-0.530357	0.787699	0.747906	-3.76113	-1.73875
CDK18	-4.99993	-0.0649054	2.25667	-1.4223	1.1668	1.39268
CDK19	-3.28638	-0.699608	0.0340376	-2.30399	-0.0662435	-0.788308
CDK2	-0.200864	0.11272	-0.16054	1.18168	0.835846	0.337711
CDK20	-6.9867	-2.09406	-2.89049	-4.04916	1.94573	1.4875
CDK3	-0.380686	-0.0407558	-0.0194694	0.377581	-1.63458	-1.2892
CDK4	-4.62104	1.53279	2.97446	-1.48911	0.894454	1.399
CDK5	1.43436	-0.118941	-0.283912	0.248254	-0.15344	-0.790541
CDK5	0.379342	-0.374885	0.00720586	-0.461544	-2.8153	-3.1701
CDK5R1	1.31242	0.648099	0.820555	-0.255776	-1.07488	-1.49864
CDK5R2	-3.77038	-2.56516	-1.36647	-2.55598	-1.38533	0.146371
CDK6	0.377812	0.373216	-0.576928	0.835635	0.607602	0.0295901
CDK7	0.882053	-0.199861	-0.484763	0.00653548	1.07174	1.52305
CDK7	1.21818	-0.0296801	0.187216	0.928541	-1.08762	-0.931907
CDK8	2.24869	0.0487543	-1.91451	1.23818	1.69251	1.00053
CDK9	-3.62334	-2.14218	-1.03818	-1.56785	0.660621	0.397631
CDKL1	-2.01427	-4.25717	1.01131	-0.883946	0.106893	0.438346
CDKL2	-0.970965	0.179353	0.888131	-0.79504	0.160107	0.636778
CDKL3	2.34353	2.65486	-1.40587	1.90996	-0.204163	0.653617
CDKL4	0.658574	-0.00242051	-0.0511138	0.78145	-0.747889	-0.666009
CDKL5	1.41931	1.33147	0.188489	1.22619	1.13659	0.933237
CDKN1A	1.29031	0.408867	0.501564	1.13995	1.68159	0.871925
CDKN1B	0.620487	2.13609	0.248372	1.19696	0.60324	-0.672135
CDKN1C	-0.34436	-1.24587	0.82812	-1.44319	2.05965	0.713798
CDKN2A	0.510501	-0.556361	-0.405635	0.334354	-1.16132	1.9171
CDKN2A	-0.185538	0.679362	0.365931	0.23589	-0.715497	0.0609634
CDKN2B	1.29637	0.315808	-0.62457	1.69196	1.85305	1.11278
CDKN2C	-5.38776	2.25466	7.40523	-0.369325	-4.23429	-4.82673
CDKN2D	-7.58979	-4.30633	-4.86788	-3.2609	0.611433	0.353827
CDX2	-0.625252	1.38511	1.25904	0.138053	0.0374582	-1.64936
CEBPA	-0.0165812	2.14406	1.78451	0.68814	-0.208661	-2.1607
CERK	1.28873	0.977845	-0.60229	1.12702	-0.380306	-1.71839
CETN2	-3.36402	-1.16148	-1.74145	-3.70906	0.822579	1.33132
CHAF1A	-5.38652	-1.30285	2.32049	-1.61492	-0.656139	0.351387
CHCHD3	1.29557	0.215715	0.0586916	0.635756	0.687025	-0.475684
CHCHD7	0.547476	2.38539	1.62509	1.52146	0.401427	0.885177
CHEK1	-6.6824	-7.31175	-6.98064	-5.90125	0.65223	-0.321364
CHEK1	-2.94082	-4.21653	0.0202027	-4.87384	-2.77644	-3.41336
CHEK2	1.7357	-0.302891	-0.0291771	2.04714	0.0161659	1.87002
CHEK2	-0.0042063	-0.0948859	-0.17108	1.10254	-0.519893	0.169585
CHEK2	0.789442	0.624007	-0.221805	1.23912	-2.40631	-1.02417
CHERP	-3.89574	-1.02205	0.60859	-1.84124	-0.633706	0.161078
CHIC2	-1.86824	-5.71655	-3.21118	-1.72538	-0.827148	-0.408874
CHKA	-0.0997247	-1.15532	1.13386	-0.892336	0.822396	0.672592
CHKB	0.676879	0.381904	0.369942	1.7622	1.20924	1.28542
CHN1	-1.22278	1.11339	2.33928	-0.838839	0.253676	0.501975
CHUK	-1.51542	-8.83585	-2.42831	-1.14103	-6.85289	-5.2505
CIB2	-8.48773	-5.74744	-6.02231	-3.76597	0.69815	-0.105339
CIC	-0.156329	1.69737	1.31653	1.20084	-0.40777	-1.3084
CIT	-2.20999	-3.25983	0.18975	-0.679162	-0.874754	0.0625849
CKB	1.45464	1.36573	0.582401	1.22452	-1.07706	0.000490808
CKM	0.730028	-0.0538641	-0.0650479	-0.43878	-2.21898	-3.81239
CKMT1B	-0.435769	-0.550565	-3.32599	-0.728943	1.30327	1.99075
CKMT2	-1.82231	-0.947747	0.323759	-0.900793	-2.09093	-1.59191
CKS1B	0.635708	1.57053	-0.121819	0.667974	0.0213412	0.0481249
CKS2	2.22179	-0.296262	-1.21633	1.89548	1.73221	1.74858
CLK1	-0.0546267	1.85524	1.38509	0.615149	0.262444	-0.393582
CLK2	0.667733	1.03319	0.791511	1.38904	1.30535	2.45858
CLK2	1.50605	0.817467	0.720545	1.53627	0.32006	1.17628
CLK3	-3.79888	-9.53768	-1.95104	-2.58884	-3.14633	-2.47183
CLK4	-0.961721	-1.41469	0.0388918	0.357636	-0.617726	0.812718
CLP1	-0.162446	-3.61865	-1.74861	-1.73684	-2.87124	-2.07589
CLTC	-2.00555	0.868875	0.691644	-2.17275	0.144997	0.488613
CMPK1	-0.752068	-0.922342	0.227806	-0.208957	0.7605	1.24376
CNBP	1.25988	-0.652307	0.735046	0.484088	-3.7346	-1.20759
CNTRL	0.489969	-0.620123	0.198438	0.0127049	-0.026058	1.09712
COASY	-1.18075	-2.41627	-3.87469	-3.62391	-3.62264	-1.96918
COL1A1	-2.44358	0.46964	1.12131	-1.6929	-0.355453	-0.910223
COL4A3BP	1.34855	0.83584	0.620121	1.47048	1.903	2.08149
COMMD3	-5.80627	-4.95866	-1.20088	-3.47828	-0.611944	-1.74734
COX6C	-2.73485	-0.275739	1.7906	-1.95873	-3.2119	-3.03076
CPNE3	0.0741222	0.435779	1.66503	0.48425	-0.608903	-0.236404
CREB1	-0.882197	0.31925	-1.95459	-1.7957	-1.18241	-2.38569
CREB3L1	-1.46794	-5.44585	-2.0436	-2.10902	-0.741754	-0.599934
CREB3L2	-0.85813	-2.19913	-0.4565	-1.03831	-1.43107	-0.521444
CREBBP	-0.116361	0.733808	-0.770067	-0.980685	1.34505	-0.834945
CRIM1	1.81129	1.52109	-2.07747	1.2772	-4.96478	-3.6076
CRKL	-1.20879	1.30913	0.938356	-0.983371	1.17573	-0.045078
CRLF2	-0.326294	-3.38232	-3.15571	-0.717406	-1.30349	-0.83379
CRTC1	-2.17475	-5.32268	-4.8649	-2.2579	-1.37626	-0.404387
CRTC3	1.35835	1.67073	1.62678	0.791043	1.14972	0.241977
CSF1R	-0.703992	2.9461	3.58554	-0.234248	2.571	2.19364
CSK	0.204053	1.28764	0.585434	1.12778	1.47143	1.28671
CSNK1A1	0.936257	0.598672	1.59038	0.434211	1.19112	1.63021
CSNK1A1L	1.54016	0.0841925	-0.381822	1.65655	1.81682	1.95262
CSNK1D	-0.0550542	1.14572	0.355278	0.270815	-0.239202	-0.175476
CSNK1E	-6.212	1.68676	3.1464	-1.59568	0.637839	0.489816
CSNK1G1	-4.53858	-2.86483	0.101481	-2.10502	0.157732	-0.00759887
CSNK1G2	2.57776	2.42171	-0.593809	1.1268	-1.03134	-1.41428
CSNK1G3	2.85047	-0.787672	-1.15475	1.7784	-0.225429	-0.187495
CSNK2A1	1.48651	0.40086	0.581593	1.7307	1.91652	1.93879
CSNK2A2	-1.07372	0.192262	-1.81135	-1.91759	-0.0302543	-1.83015
CSNK2B	-0.743755	-0.359523	0.917961	-1.72397	1.26399	0.853657
CTNNB1	0.739125	0.859192	0.189437	0.406462	0.379586	-0.18888
CYLD	-3.59288	-3.57619	-3.82773	-3.25543	0.108816	1.47166
DAPK1	-2.19482	-2.20969	-1.6354	-2.276	2.39683	2.21307
DAPK2	-1.32516	1.00396	1.71258	0.358905	-0.89039	-0.414398
DAPK3	1.55317	0.406246	-0.553119	-0.189242	-1.94815	-3.81804
DAXX	0.382701	0.502345	-1.11685	1.18277	0.808644	1.00937
DBF4	1.27941	0.81555	-0.515941	0.881909	0.143567	-0.980904
DCK	-1.81988	-1.8513	1.05838	-0.771556	-1.14114	-1.60044
DCLK1	1.06158	-0.109463	-1.4175	-0.0158916	-1.05513	0.71434
DCLK2	0.292681	0.0368429	-0.668729	0.345451	0.126406	0.553057
DCLK3	0.228871	-1.59424	-0.829291	1.69222	0.408246	2.17038
DCLRE1A	-0.384045	-0.725638	-0.505509	-0.00626906	-2.57648	-2.44767
DCLRE1B	-2.55945	1.00975	0.632679	-0.618002	-4.40969	-5.38833
DCLRE1C	0.202072	0.0508563	0.559286	1.1144	0.151562	1.08204
DDB1	-2.65565	0.298559	0.626481	-1.4905	0.963509	0.783859
DDB2	0.598705	0.396665	-0.924246	2.05393	1.86133	1.50934
DDB2	1.27842	-0.0103494	-1.41338	2.44673	1.34264	1.42539
DDIT3	-3.88718	-8.49434	-13.7487	-3.52219	0.348272	-0.287421
DDR1	-1.32871	-3.14489	-0.807813	-1.43183	-2.17163	-0.257464
DDR2	-1.16338	0.502892	0.257431	-1.03545	-0.555551	-0.697824
DDX10	-2.66283	1.66334	2.2264	-0.740896	1.81575	1.56019
DDX17	0.320336	0.482191	2.12388	0.489635	1.17313	0.673352
DDX21	-1.84032	-0.327958	1.85222	-1.52128	0.117521	0.00226767
DDX5	-0.446006	0.800243	-0.19759	-0.442637	1.60461	1.39728
DDX5	-0.657395	0.19173	0.0395414	-0.369116	0.562041	0.421967
DDX6	0.558799	2.13961	0.925702	1.39517	2.23781	2.51459
DEK	-0.148908	-1.98836	-0.567557	-0.167579	-0.135395	0.663619
DESI2	0.92379	-0.478955	0.293725	-1.72004	-3.87886	-0.888265
DGKA	2.01467	1.11669	-0.0704373	2.0382	0.366049	1.29414
DGKB	1.25107	0.751295	0.155785	0.133463	0.252589	-0.888634
DGKD	1.18109	0.273403	0.22776	1.26649	0.353343	1.18805
DGKG	1.86408	0.520481	-1.30725	0.179555	1.48704	0.670885
DGKH	-1.00058	-2.79472	1.74372	-1.67516	1.70984	-0.532385
DGKI	0.214391	1.55942	1.49894	0.133737	0.799271	-0.858372
DGKK	-2.68181	-0.439949	6.46074	0.325516	-1.12016	-0.235288
DGKQ	-3.19364	-0.285277	0.880758	-1.93737	0.350155	0.770952
DGUOK	-2.39996	-2.18436	-1.16214	-1.00145	0.115493	1.7035
DHX15	-1.20758	1.09124	1.4886	-0.136219	0.697845	0.45755
DHX9	-0.0483503	-1.01928	0.35447	0.138704	0.503953	0.665101
DICER1	-2.12123	-19.613	-6.53441	-4.0127	-5.99179	-3.80115
DLG1	-0.688132	1.44859	1.02694	0.200943	0.218598	1.0632
DLG2	1.22249	1.88771	0.504473	1.47015	2.92442	2.1992
DLG3	1.63981	0.926022	0.378174	1.59194	2.38987	2.41654
DLG4	-2.359	-5.43258	3.25158	-4.03585	0.240162	0.331519
DMC1	0.592207	0.580621	1.17675	0.58972	0.640359	2.27215
DMPK	-1.54973	-2.48056	-3.56015	-1.40611	-4.06915	-2.44475
DNM2	-1.28979	0.740175	-0.434733	-0.296222	0.34665	-0.187038
DNMT3A	-0.930746	-2.36431	-1.94053	-2.62936	-1.02228	-0.697123
DSTYK	2.16032	0.356696	-1.32846	1.50023	0.595384	0.854207
DTYMK	0.926694	1.09977	0.994138	0.926318	1.03495	0.749127
DUSP21	0.745642	0.0902315	1.1033	-1.08093	-2.87957	-0.226732
DUT	0.807272	-0.745104	-0.533334	1.0891	-0.638944	0.951747
DYRK1A	-1.8458	1.80819	2.2252	-0.012945	0.803364	1.23385
DYRK1B	-0.532544	-0.707714	0.244485	-1.49544	-0.773608	-0.668616
DYRK2	-0.388822	0.913353	1.82459	-1.23966	0.171463	0.166198
DYRK3	1.63133	0.999598	0.914364	1.48127	0.0484313	-0.65068
DYRK4	1.98755	2.38141	0.0297298	1.16065	1.06312	-1.55352
EBF1	-0.292481	0.713359	-0.878744	0.0202215	0.677204	-0.335515
ECT2	-2.29708	-1.11323	0.145265	-1.3724	-0.195371	0.224372
ECT2L	-1.57005	-5.71229	-2.89757	0.310092	-2.51962	-1.53067
EEF2K	-4.21583	-1.35495	-1.75215	-1.89998	0.645056	-0.296166
EFNA3	-0.250262	-1.25165	0.502898	-0.0629203	1.7096	0.598671
EFNA4	-1.85857	-9.85756	-7.19146	-3.06336	2.17438	1.03448
EFNA5	0.777373	1.37715	1.84881	0.917051	1.85415	1.5796
EFNB3	-1.31034	-0.602063	1.15613	-1.17811	0.0399772	-0.0582523
EGFR	-0.161932	0.750052	-0.895544	-0.0327107	-1.24457	-2.25699
EIF2AK1	-0.246287	1.28534	0.392836	0.0261838	0.286892	-3.66669
EIF2AK2	0.657799	1.42313	1.24063	1.55697	2.99278	2.71682
EIF2AK3	0.370969	0.476825	0.0597665	0.964373	-1.22257	-0.36844
EIF2AK4	0.482942	0.278245	-0.0155674	1.10411	0.471308	0.915317
EIF4A2	0.171058	1.85417	0.380644	0.679673	1.71432	1.67638
ELF4	-0.329503	-0.375976	1.229	-1.11669	-3.08276	-1.94238
ELK4	-0.926225	-0.885124	-1.40402	-1.96903	-1.41145	-2.41377
EME1	0.384448	-0.796848	-0.359427	0.325464	-1.85438	-0.766602
EME1	0.130597	-0.768465	0.0502728	-0.597705	-0.536578	-0.824756
EME2	-0.922515	0.726334	-2.09903	-0.0515885	-1.32903	-0.774074
EME2	-1.59058	-3.86007	-7.44886	-0.757849	-3.26825	-2.4514
EML4	-0.940479	0.378096	0.711649	0.212376	-2.96985	-3.19219
ENDOV	-0.0508689	-0.00116464	1.64551	0.0525906	-0.906581	-2.94979
EP300	-1.97214	-0.270458	-1.81607	-3.00051	0.00175995	2.06976
EPHA1	0.840219	-0.276771	-0.59317	-0.0199303	1.7867	-0.278197
EPHA10	-0.655334	-0.296194	-0.978064	-0.55114	-0.973994	-1.57063
EPHA2	-0.186805	0.759335	-0.690267	1.13136	1.45026	0.399296
EPHA3	-1.76788	-7.10879	-2.03847	-1.90159	0.734501	-0.368083
EPHA4	1.1549	-0.500293	-1.87907	0.710674	-1.165	-1.12439
EPHA5	2.96703	-0.313922	-2.19622	2.59147	2.13528	2.51224
EPHA6	-5.62091	-4.70252	-2.75479	-3.3	-1.52447	-0.87505
EPHA7	-1.11576	-2.10359	1.24662	-0.62855	0.365609	0.248861
EPHA8	-3.53207	-3.71359	-7.61347	-1.74764	-0.212757	-1.46609
EPHB1	-2.24946	-4.86504	2.95111	-0.558332	-6.1924	-4.08878
EPHB2	-0.26721	-2.30911	0.422908	-1.05326	0.516738	-0.00745654
EPHB3	-0.167842	-1.11577	-0.708404	-1.81293	-2.20267	-3.57984
EPHB4	0.62557	0.351734	1.21604	0.722766	-0.233387	-1.71842
EPHB6	-2.91802	2.07586	6.93949	-0.945521	-4.39636	-5.35511
EPS15	-0.562088	0.645015	-0.59174	-1.11821	0.800549	0.0201283
ERBB2	0.41924	0.840454	-0.584074	0.798243	2.48395	2.36095
ERBB3	-0.0738224	-0.525758	0.216667	-0.576045	-0.140288	-0.778852
ERBB4	0.668514	0.485992	-5.13329	-1.67377	0.839524	-1.67771
ERC1	1.40458	-0.160019	0.703719	0.908877	-1.85426	-0.328182
ERCC1	-5.34124	-1.96717	-5.24627	-3.48114	0.485183	0.290885
ERCC2	0.846626	-0.0280426	-1.01015	1.17537	1.11638	1.85867
ERCC2	0.248914	0.638377	-0.793362	0.744757	0.682063	0.889258
ERCC3	0.272809	0.580468	0.35371	0.77277	0.533551	1.79982
ERCC3	0.912793	0.0975635	-0.90865	1.2755	0.462903	1.50445
ERCC4	-1.38812	-0.337218	-2.01534	-3.43508	-0.603903	-0.0853584
ERCC4	-1.10529	-1.49292	0.185924	-3.16962	-0.0312608	-0.485453
ERCC4	-0.77405	-1.72166	0.371783	-1.13943	-0.560995	-1.02351
ERCC5	0.165435	-0.384365	-2.16006	0.227395	1.06014	-0.110295
ERCC5	-0.480524	0.64574	-0.955366	0.522437	-0.040043	-0.161391
ERCC5	-0.119491	0.126561	-2.41333	-0.086884	0.521545	-0.67218
ERCC6	-1.91172	-0.454206	-0.77725	-2.60126	1.29466	1.45411
ERCC6L2	0.177784	0.0914444	-0.91182	0.366829	0.264465	0.590114
ERCC8	-1.80104	-3.20868	-2.97483	-3.56637	1.73453	1.61432
ERG	-1.38543	1.50165	0.533472	0.877455	1.39572	0.607384
ERICH3	1.00865	-0.27892	-0.326945	0.828492	-0.380674	0.0191225
ERN1	-1.25333	-6.05938	-1.97113	-2.19418	-0.883729	-1.09459
ERN2	0.457728	-0.655705	-1.51548	0.169006	1.71639	0.365022
ETNK1	1.78288	2.44341	-1.90834	0.221698	1.10905	2.06402
ETNK2	-6.70865	3.51535	3.79795	-3.13147	2.10241	2.67042
ETV1	-0.46758	1.234	0.471574	-0.311814	0.265688	-2.47044
ETV4	-0.682621	2.14015	1.39351	0.210774	0.652293	-0.209069
ETV5	0.668163	1.32422	0.60718	0.811811	-1.64169	-0.675607
ETV6	0.860473	1.16455	-0.0370958	1.19409	-0.135025	-0.856276
EWSR1	0.503157	1.70736	-0.0141953	0.252279	0.702181	-0.295631
EXD2	1.41141	0.511579	0.129516	1.10284	0.589203	-0.652607
EXO1	1.16885	-0.270076	1.01531	1.30151	-0.337558	0.0996494
EXOSC10	-4.63741	0.999812	-0.369576	-4.15556	-3.27764	-1.87185
EXT1	0.842192	0.00351399	0.167118	0.81663	0.448454	1.70255
EXT2	-0.603172	-1.0622	0.131067	-0.515244	0.282046	2.81276
EZH2	-1.96398	-2.64435	-1.0647	-1.22059	0.380283	0.496211
EZR	0.386541	-1.27079	-1.04728	-1.22331	0.86848	-2.40959
FAAP24	-0.342945	-0.022083	0.965594	0.00100643	-1.75041	-1.66057
FAM46C	1.25282	1.2189	-0.70985	1.17201	-0.75402	0.334733
FAN1	0.046352	-0.322616	1.12515	-0.151961	-0.658545	-0.718077
FAN1	-0.381631	-1.62751	1.042	-0.415853	-1.23815	-2.54469
FANCA	0.617596	-0.307336	-1.32714	-2.52827	-0.0767618	1.24147
FANCA	0.292428	-0.537312	-0.300105	-2.58657	-0.716018	-1.79373
FANCB	-0.208821	-0.61553	-0.05824	0.136969	0.574985	0.168935
FANCC	0.661497	0.492996	1.4069	0.201699	0.433425	1.46632
FANCC	1.11234	-0.661682	1.25373	0.683914	-1.28567	-0.857186
FANCD2	0.469132	-0.529317	-1.02157	0.267951	0.12673	0.564482
FANCD2	-0.0757195	-1.04578	0.408632	-0.233203	-0.453097	-1.00709
FANCE	-1.27219	-5.94581	-3.01129	-3.86457	-0.982932	-0.598222
FANCE	-0.907308	-1.54232	0.0157453	-2.89804	-1.48346	-3.83099
FANCF	1.68052	-0.064443	-0.965133	1.38896	-0.529544	0.47848
FANCF	1.06761	0.159772	-0.220922	1.15328	-1.77104	-2.64555
FANCG	1.76443	-0.444088	-1.27384	0.308675	-1.28877	-1.0594
FANCG	1.49646	-0.241617	-0.175902	1.16463	-1.35398	-4.01998
FANCI	-0.329758	-2.12955	0.6435	-1.37412	-1.85486	-2.24546
FANCL	1.18453	-0.306395	-0.448379	1.81013	-0.204913	-0.0879101
FANCM	0.146739	0.263862	0.102357	0.740322	-0.733865	-2.52251
FAS	-2.36998	-7.69084	-7.64423	-5.2539	0.663909	0.461686
FAS	-4.58503	1.59971	-5.08153	-4.47322	-1.28228	-1.38319
FASN	-0.788182	-2.8099	0.47644	-1.49908	-3.23647	-3.09042
FASTK	1.50176	0.923325	-0.0482822	0.900708	2.0037	0.899731
FBXO11	-1.2045	1.65968	2.1657	0.190867	-2.91607	-4.50625
FBXW7	1.49144	0.375259	-1.41416	1.75409	1.2788	1.67104
FCHO1	-9.12667	-0.999664	1.22829	-4.13947	-1.07106	0.66939
FEN1	-3.80849	-5.59815	1.35245	-3.808	0.22963	0.336648
FEN1	-8.09405	-4.6527	-7.258	-3.16451	-0.662576	-1.96744
FER	-0.421108	0.217655	-0.465484	0.0845157	-1.88514	-1.19551
FES	-1.44937	0.558302	-0.574659	-0.377395	-0.840782	-2.57699
FEV	-8.17676	-5.68511	-3.35509	-3.78744	-1.32521	-1.07119
FGFR1	-1.15226	-0.0390288	-0.726378	-2.07016	1.24149	1.52025
FGFR1OP	0.624531	2.29354	0.536256	1.71857	2.69738	2.88897
FGFR2	-2.95066	-2.06358	-1.8593	-3.27557	1.30155	0.286069
FGFR3	-4.39913	0.496477	0.157763	-1.8994	1.35331	1.41074
FGFR4	-1.08009	1.56943	1.97668	0.274071	2.76346	1.95211
FGFRL1	1.07846	1.45416	0.90222	0.6188	1.65114	-0.629515
FGR	-4.15459	-7.51319	-6.63406	-3.61562	-2.30894	-2.00341
FH	1.16753	0.503262	0.38569	1.74665	0.238786	1.78152
FHIT	0.100548	-4.42114	-2.12173	-0.707035	0.00982273	0.519225
FIGN	0.00347447	-2.356	-0.208403	-1.20893	-0.320566	-0.674473
FIP1L1	-0.277551	-3.93802	-1.80108	0.142455	-4.31895	-2.10502
FLCN	-1.53858	0.161273	0.221033	-1.21549	-0.666784	1.07414
FLI1	0.482844	0.971558	0.131266	0.660133	-0.414705	-0.105957
FLT1	2.05395	-0.0538141	-1.09039	1.86088	-0.05066	1.15453
FLT3	-0.170513	1.468	3.96904	0.859626	-0.0777213	0.257897
FLT4	-1.02969	1.02436	2.12016	-0.350313	-1.23079	-2.15578
FN3K	0.468878	-5.52933	-3.2432	-0.490152	-3.7276	-2.46723
FN3KRP	-11.6156	4.5012	8.18457	-3.60293	-2.85906	-3.32804
FNBP1	1.57944	1.95426	0.85205	2.0761	1.36375	0.72013
FOXL2	-1.66359	1.89905	0.750343	0.245427	1.03619	-0.453677
FOXO1	1.37273	1.90782	0.491259	1.84194	1.48453	1.77078
FOXO3	0.808868	2.15323	2.08015	1.26823	0.459122	1.47627
FOXP1	-1.20021	-1.86342	-0.44021	-0.403783	-1.56572	-0.844851
FRK	0.388607	0.203408	1.66089	0.334357	0.715622	-0.618971
FUBP1	-0.614735	-0.15709	1.31544	-0.126429	-0.206948	-0.210413
FUK	-0.412589	-0.0928121	-0.819593	-0.563172	0.524295	0.608319
FUS	0.202974	1.23067	1.47037	0.118732	-0.509833	-0.333805
FXN	1.5922	-0.748129	-0.723129	1.75324	2.0518	0.92273
FYN	-2.45389	1.84686	0.563696	0.353928	0.534898	2.31249
GAK	0.39072	0.206925	2.86467	1.20969	0.362932	0.683413
GALK1	0.595631	0.656878	-0.146666	-1.20671	-2.54074	-0.00759814
GALK2	-6.06337	-4.40405	-1.32355	-3.52376	-0.46172	0.600703
GAS7	1.16946	2.67251	0.744073	1.7614	1.57544	2.03425
GATA1	-1.43056	-3.32124	0.761291	-2.89196	-0.40637	-0.295519
GATA3	-2.01807	-8.78598	1.21278	-3.45533	-2.65541	0.17371
GCK	0.397085	-0.758079	-0.711891	-1.21692	0.506436	0.287966
GEN1	0.740374	-1.18873	0.483704	0.121496	-1.70831	-0.204928
GEN1	0.860656	-0.850864	0.0220059	-0.691048	-2.11187	-1.75025
GK	0.670553	2.75263	-1.21584	1.09567	-0.507186	-0.580631
GK2	1.22927	0.16933	-0.376446	1.96319	1.77122	1.3311
GMPS	-4.00073	1.5914	1.05386	-0.660496	-0.602588	0.165567
GNA11	-0.472266	-0.769994	0.277973	-1.36085	-3.68945	-2.65984
GNAQ	-1.6239	-1.51062	2.49479	-2.55964	-2.44736	-3.26751
GNAS	-1.15121	2.09323	1.2379	-1.50204	0.831765	-1.77076
GNE	0.0970609	1.3077	-0.996998	0.861281	1.12585	1.23113
GOLGA5	2.56883	0.47802	-0.791393	1.86014	1.51907	1.0085
GOPC	-0.00731482	0.923211	0.334931	0.722104	0.103439	-0.6964
GPC3	-0.764984	0.218521	-1.74314	-0.912059	-1.48761	-1.83978
GRK1	1.99261	1.68559	-1.00402	1.50531	-0.368402	0.0526908
GRK4	-3.14922	-1.56475	-1.71122	-3.79711	-0.761634	-1.27775
GRK5	1.82592	1.13344	-1.67496	1.017	-0.545058	-0.885881
GRK6	1.09423	0.0110338	-1.88136	0.996346	-0.0517507	-0.795856
GRK7	-1.08598	-0.800164	-0.403055	-1.94591	1.99337	0.113339
GSG2	-1.0394	2.54128	0.392747	-0.257754	-3.24136	-2.5825
GSK3A	-1.30541	-0.318758	4.68711	-0.922245	-1.45481	-2.21551
GSK3B	1.24501	-0.540447	0.383828	1.61773	0.577595	1.60947
GTF2H1	-2.43807	1.36306	1.51669	-0.8859	0.408805	1.20805
GTF2H1	-2.37009	-3.79648	-0.779029	-0.669387	-1.69547	-0.049833
GTF2H2	1.24592	-0.13448	0.243283	1.16825	-0.630592	0.30179
GTF2H3	0.295703	0.729824	1.87722	0.426814	-4.0763	-3.44398
GTF2H4	-4.38281	-0.404057	0.39644	-2.49059	1.99566	1.63525
GTF2H5	-0.627793	0.414085	2.08186	-0.643289	2.0755	1.54701
GUCY2C	0.262974	-1.57626	0.217846	-0.502429	-2.63124	-5.54695
GUCY2D	-8.25754	-0.300614	3.6045	-4.28166	0.000345623	-0.307917
GUCY2EP	1.25335	-0.756958	-0.633567	-0.169536	-0.361094	0.277816
GUCY2F	0.200015	-0.141033	0.554728	0.580995	-2.52883	-1.87302
GUK1	-0.466784	-0.485139	-0.747822	-0.63905	1.14417	1.95029
H2AFX	-3.58823	-0.735859	1.56682	-2.41884	-2.24262	-2.98768
H3F3A	0.0121557	-0.592907	0.557257	0.135552	0.418845	-0.223113
HCK	1.62219	1.50072	-2.59314	0.291856	-1.44465	-3.01173
HEATR5A	0.724298	0.841612	1.87399	0.674374	1.44991	0.257431
HEATR5B	0.0529031	0.725011	-1.57721	0.796777	-0.666555	-0.0740092
HELB	0.523936	0.326461	1.72815	0.784619	0.58599	0.583806
HELQ	-1.05702	0.696445	0.190773	-0.02208	-0.358139	-3.38731
HERC1	-0.504749	-1.24125	-3.35503	-1.21322	-2.59929	-1.58079
HERPUD1	0.399104	-1.41947	-0.0979574	-1.01788	1.25713	1.36778
HEY1	-4.2715	-12.6687	-11.6073	-4.49582	-0.0525739	0.821529
HIP1	-4.92998	-10.6154	-13.3369	-5.05703	-0.480693	-0.53577
HIPK1	1.00251	3.76321	-0.387599	1.1736	-1.91758	-1.27308
HIPK2	-1.09642	-3.35122	-1.11669	-0.595265	-3.36611	-3.91015
HIPK3	-0.321803	-1.95177	-2.06805	-1.64249	-1.15774	-1.83294
HIPK4	0.741895	0.758958	0.337268	1.23841	-0.031937	0.22635
HIST1H4I	0.417315	-0.377446	0.00346229	-0.484422	0.37502	0.27057
HK1	1.58176	0.780359	-0.986775	1.41021	-0.000345623	0.266827
HK2	-4.30874	-6.12391	-4.26967	-2.4081	-2.40135	-0.440205
HK3	0.441315	0.0614919	-2.09527	1.05682	0.731868	0.950755
HLTF	0.393315	0.775905	1.11459	0.317978	-0.210866	-0.915919
HMGA1	0.872558	1.51612	-0.147124	0.642887	-0.169177	-0.702724
HMGA2	-16.3049	-2.8142	-3.78833	-7.01178	-1.24417	-0.575948
HNF1A	0.427523	0.209244	-1.09131	0.585983	-0.183046	1.74722
HNRNPA2B1	-1.07886	-0.170622	-0.269855	-1.43993	0.516048	-0.0400827
HOOK3	0.743703	-0.234245	-0.80049	0.196295	-3.55173	-3.41717
HOXA11	0.634969	2.79448	2.00664	0.887226	0.641059	-1.89477
HOXA13	0.768212	1.26479	1.76833	1.11627	0.918079	1.21491
HOXA9	0.809423	2.1079	-0.691778	1.21506	1.31553	1.69611
HOXC11	-1.7639	-4.70465	-4.60781	-1.74189	-1.52056	-2.05621
HOXC13	-0.79087	-2.1478	-1.63715	-2.20161	0.173671	-0.968914
HOXD11	-3.13908	-0.713188	-3.55466	-2.06703	0.438675	-0.909472
HOXD13	-0.472118	-1.63525	0.592808	-2.69892	-2.9148	-3.28368
HRAS	-0.102924	1.00717	2.22265	-0.0628817	0.25489	0.686517
HSP90AA1	-1.36701	2.1743	1.82384	0.164089	0.43603	0.331725
HSP90AB1	-0.420187	0.116934	0.168268	-1.17005	-0.0656867	-0.500952
HSPB8	1.26851	1.53561	0.431826	1.66109	1.0028	0.756003
HUNK	-3.12454	-4.82523	3.42284	-1.84833	-5.45621	-3.37915
HUS1	1.29086	0.129064	-0.189106	0.991209	0.244596	0.922602
HUS1	-0.236402	0.799725	0.396247	1.41709	-1.60378	-0.957086
HUS1B	-0.325731	-1.17604	-1.33195	-0.812731	0.476622	-0.207257
HUWE1	0.801401	0.14542	0.238775	0.9179	1.45811	0.947183
ICK	-1.75359	-1.21345	-0.449475	-1.60074	-1.28081	-1.03784
IDH1	0.093823	-1.16738	0.38344	-1.46589	0.449712	-1.17576
IDH2	1.1184	1.53282	-0.0749284	1.11411	1.08874	-0.575026
IGF1R	-0.577174	1.19734	-1.72695	-0.359706	1.35712	0.953078
IGF2R	-0.312029	0.0218006	-1.22848	0.51164	0.396133	1.3909
IKBKAP	0.0196963	1.62202	0.786412	0.6633	1.11582	-0.150006
IKBKB	0.354897	0.833369	1.39858	-0.0581136	1.01242	-1.1988
IKBKE	-0.392497	-4.10256	-1.34737	-0.953397	-0.219396	0.403686
IKBKG	-2.53431	1.7691	2.02632	-0.32649	-0.709885	0.882086
IKZF1	0.473539	-0.00921071	-1.80791	0.520233	0.0773469	1.44145
IKZF1	-0.556718	0.405311	-0.0513306	-0.153126	0.269162	0.495043
IL2RG	0.625975	1.66867	1.07275	1.12533	0.170689	-0.952512
IL6ST	0.848153	0.923795	-0.200699	1.09301	1.36068	0.91781
IL7R	-0.172801	0.590856	2.09454	-0.144256	0.68931	0.707139
ILK	-2.38533	-0.670994	-2.3877	-1.94428	-4.62723	-1.24872
ILK	-3.27506	-0.527703	-0.0976972	-2.19263	-4.09119	-2.04632
INSR	-1.72438	-0.420784	-0.86786	-0.507302	-2.36457	-1.03129
INSRR	-0.399605	0.857077	1.94084	-0.178864	0.686522	0.85227
IP6K1	0.563368	-0.353374	0.124644	0.510254	0.297151	0.21273
IP6K2	-0.920744	-0.0544896	0.819601	-0.536663	-3.07055	-2.79154
IP6K3	-0.598927	-6.722	-1.4347	-1.90911	-2.63011	-3.38876
IPMK	-0.422765	-0.516645	-4.83937	-0.623164	-0.943835	-0.259151
IPPK	-1.6499	1.54862	4.92598	-0.299315	-2.58005	-1.37901
IRAK1	1.00271	-2.15528	-3.73463	-1.13705	-0.360248	-1.65259
IRAK2	1.1542	0.492774	1.15843	0.446886	-1.03141	-4.14601
IRAK3	-6.87335	-8.07038	-1.31311	-5.00292	1.31781	1.46582
IRAK4	0.530765	-0.497908	0.492721	-0.216528	-0.279234	-0.66332
IRF4	0.958039	1.37186	0.776285	0.818143	0.711092	0.277031
ITK	2.04916	1.49085	0.239586	1.21421	-0.44502	-1.11661
ITPK1	-2.77103	-3.05117	1.05548	-2.40266	-4.00907	-5.2933
ITPKA	0.521424	0.336828	3.52508	0.208138	1.05017	1.02497
ITPKB	0.28623	-0.126466	-0.31184	-0.328809	0.464081	0.14317
ITPKC	2.10629	-0.478115	-2.43009	1.28431	-1.17879	0.767355
JAK1	1.22703	-0.672687	-0.810816	-0.299573	-3.43418	-1.63759
JAK2	1.46027	0.676183	-0.511151	0.812008	-1.54568	-2.22472
JAK3	-2.7593	-1.41584	3.14975	-0.0750213	-1.12312	-1.8114
JAZF1	1.18891	1.43663	0.277521	1.76683	1.42845	1.20078
JUN	0.891043	-0.20266	-0.174996	-0.017182	0.10023	-0.140125
KAT6A	0.721289	2.39462	0.539529	1.32236	0.456515	0.490825
KAT6B	1.21865	1.71141	0.647773	1.41708	0.978442	-0.781998
KCNH2	0.605605	0.165761	0.736203	-0.679846	-0.574175	-3.11199
KCNH8	0.54418	0.172613	0.874033	0.122985	-3.06139	-4.27856
KCNJ5	0.723112	1.7499	0.163461	0.722169	1.19104	0.126757
KDM5A	0.434733	1.14053	1.27423	0.420744	-0.674167	-0.614468
KDM5C	-1.8573	-8.08886	-2.28212	-1.68615	-2.0688	-2.22615
KDM6A	-2.26264	2.18049	2.77717	-0.20478	-3.13537	-2.56588
KDR	0.435054	-3.95897	0.176257	-1.46498	-1.46557	-2.41655
KHK	-1.49013	-0.175919	-1.03598	-0.896318	1.46555	1.27452
KIAA0368	0.4792	0.628613	0.0402015	0.339267	0.146647	0.162658
KIAA1549	1.82584	1.13329	0.508365	2.00086	-0.725961	0.823692
KIAA1804	3.06287	2.49656	-0.572309	2.11443	2.23604	1.66213
KIF5B	0.834472	-0.703912	-2.12745	1.10939	-0.388024	-0.0191845
KIT	1.45587	2.20477	0.618042	0.984857	0.791435	-1.56443
KLF4	1.17593	-4.57697	-2.22743	-0.245248	-4.60446	-3.60369
KLF6	0.376486	-0.614823	-1.37273	0.0832457	-0.897068	0.994462
KLK2	0.821463	0.365727	-0.549908	0.534835	-0.991577	-0.180797
KMT2C	0.219414	1.68134	1.64828	0.697919	0.0827747	0.526429
KMT2D	-10.5249	-4.62401	-4.4307	-5.90194	-1.28563	-1.88048
KRAS	-0.200102	1.32536	0.900722	0.795058	0.735822	0.198014
KSR1	-3.06103	-8.85537	-0.524637	-2.4106	-4.99376	-2.46718
KSR2	0.475145	2.51633	0.0978317	0.0497846	-1.37599	0.854252
KTN1	0.362486	2.311	1.99203	0.126791	0.490075	0.128318
L1CAM	-3.75419	-8.55603	-3.98701	-1.41348	-2.71984	-3.4065
LASP1	-0.627351	-0.336879	0.422263	-0.321941	0.715074	0.390656
LATS1	0.285608	-0.770288	1.41663	1.36292	-0.148717	-0.0910426
LATS2	2.06812	0.35648	0.111229	1.14703	1.20874	0.255119
LCK	-1.94852	-4.81048	-2.54583	-2.58083	1.34991	0.172047
LHFP	-9.00669	-5.61602	-3.68012	-4.26859	-1.06453	-1.18567
LIFR	-0.134034	1.9275	1.42952	1.46841	1.70649	1.55349
LIG1	1.30864	0.146941	-5.65651	0.556222	1.5832	-1.02851
LIG3	1.09469	0.322391	-0.43067	1.20884	-0.805496	0.697472
LIG4	-0.62182	-1.93525	1.4338	-2.72096	-1.8384	0.197806
LIMK1	1.15413	-2.09873	-2.26417	-0.869675	-1.30089	-2.08465
LIMK2	-0.928264	1.00404	-0.79484	-0.360003	-0.706866	-0.369153
LMBR1	1.72851	-1.06665	-2.09957	0.781774	-2.61364	-2.20529
LMO1	-10.8579	0.238007	-0.384224	-3.8688	0.447447	0.969466
LMTK2	0.978269	1.15944	0.960704	1.82579	0.519109	-0.0229885
LMTK3	-2.4729	0.287806	0.934235	-3.41409	-4.25472	-2.83806
LPP	-0.517717	1.17315	0.797636	-1.74884	-1.68004	-3.36475
LRIG3	0.168092	1.67547	1.08643	1.01844	1.09119	1.65144
LRRK1	1.24587	0.342517	-0.583517	1.5704	1.46962	1.62611
LRRK2	1.17539	0.33066	-1.72091	1.1239	-0.332897	-0.451414
LTK	0.957645	0.352499	-0.0382572	0.660597	-0.748076	-1.99297
LYN	-0.424524	-1.20043	-1.04706	-0.609128	-0.504528	-0.0706353
MAD2L2	-3.23964	-0.49259	-1.57295	-2.63578	-4.47429	0.618631
MAF	0.40802	0.482581	0.861903	0.317477	-1.28973	0.17498
MAFB	1.19847	1.19645	0.0794641	1.23833	1.74524	1.7317
MAGI1	-1.14435	-2.94745	-1.56133	-2.49627	0.209884	0.418864
MAGI2	-3.012	2.27998	3.09418	-2.53131	1.6586	2.20324
MAGI3	-2.76793	1.18409	2.13642	-1.87603	-2.25054	-1.30673
MAK	-0.0479795	-1.322	0.959789	-0.119836	-0.636458	0.698015
MAML2	0.397905	0.23686	0.303826	0.904328	-0.619493	0.401779
MAP2K1	1.47447	-0.245907	-0.357134	0.608232	-1.65632	-1.45415
MAP2K2	-0.431803	0.625997	0.932605	1.18158	0.320585	1.50713
MAP2K3	0.366074	-1.29889	0.252852	-0.673219	-0.0466381	-1.14597
MAP2K4	-0.748506	0.508354	-1.50719	-1.39772	0.78269	1.58673
MAP2K4	-0.611625	-1.86964	-1.86408	-0.922104	-0.275512	-1.46405
MAP2K5	1.13069	-0.429596	-1.0405	0.898411	-0.788322	-1.51657
MAP2K6	0.775619	-1.34735	-0.420601	0.355634	0.221134	0.925714
MAP2K7	-1.7209	-1.43578	2.93777	-0.551874	-1.28386	-0.481626
MAP3K1	-0.274942	-0.834995	-2.39462	-0.608715	-1.28358	-0.674797
MAP3K10	-0.385062	-0.746055	1.02092	0.142054	2.27278	2.04455
MAP3K11	-5.0736	3.43881	6.59899	-1.67545	-6.47123	-4.90173
MAP3K12	1.13601	2.40009	0.937592	1.24364	0.0484905	0.447873
MAP3K13	-0.867131	0.105394	1.32329	0.140041	1.22703	0.836936
MAP3K14	1.06216	2.76439	1.65049	0.567825	0.434712	0.776591
MAP3K15	2.31324	1.56467	0.705045	2.23502	2.08042	0.924997
MAP3K19	-2.7226	-2.86584	0.465778	-2.36051	-1.13483	-1.56861
MAP3K2	2.20542	2.60223	0.341802	2.08912	1.66968	1.40401
MAP3K3	0.0846682	-0.71279	-1.09118	-1.11171	1.15242	0.929963
MAP3K4	0.597936	-0.719662	-0.43445	0.967679	0.683767	1.98417
MAP3K5	1.07759	-0.707245	-0.435118	0.850478	-1.96748	-0.601384
MAP3K6	0.54653	-0.0545096	-0.147434	0.438513	0.0520846	-0.407365
MAP3K7	-2.06886	-2.9573	-3.25019	-2.52245	-3.62574	-3.82127
MAP3K8	-2.69299	-2.24878	-0.356295	-1.09402	2.33233	2.05129
MAP3K9	-6.37301	-1.35905	-0.923576	-3.90873	-0.319054	-0.0890284
MAP4K1	0.314437	-0.637943	-1.20602	-0.70646	-3.53862	-1.90201
MAP4K2	-0.394261	1.286	1.35601	0.39868	1.11613	0.471353
MAP4K3	-0.594951	0.883097	0.992598	-0.0167962	-1.52005	-1.23087
MAP4K4	2.61355	0.00144339	-1.84038	1.9577	0.739068	-0.606874
MAP4K5	0.853314	1.89106	1.41825	1.1156	-1.72383	-2.03722
MAPK1	-5.88749	-0.541589	5.23266	-1.91037	-0.0377357	-0.341398
MAPK10	-0.240456	0.390677	-0.288606	0.834711	0.418691	1.35493
MAPK11	0.0311635	0.924268	-0.453964	-0.551376	0.573104	0.23132
MAPK12	-0.0106837	0.43259	-1.24018	0.0103663	-0.405472	0.647193
MAPK13	0.413548	-0.403699	-1.08206	1.00929	1.4054	1.9068
MAPK14	1.14501	0.582919	-0.331252	1.39047	2.33173	1.18544
MAPK15	-0.262147	0.0017462	-4.10248	-1.24119	1.09386	-0.560648
MAPK3	-0.148074	1.69848	0.81403	-0.900453	-1.76198	-3.27647
MAPK4	0.71524	-0.908679	-1.5272	0.426065	-2.99894	-0.700192
MAPK6	0.45487	-0.660316	-0.797885	0.246709	1.43201	1.44197
MAPK7	1.98119	-1.06712	-2.36191	1.5785	0.396376	0.620314
MAPK8	0.129435	0.668951	1.93029	0.406467	-1.43624	-1.21243
MAPK9	2.25906	3.14211	-1.44637	1.70551	3.04159	2.51926
MAPKAPK2	-0.226931	-1.09427	0.700634	0.509347	-0.782214	0.0406636
MAPKAPK3	-1.5497	0.254915	0.488845	-1.22592	0.477086	-0.932357
MAPKAPK5	-0.526339	0.199641	0.278191	0.388882	-1.85359	-2.07745
MARK1	0.198769	1.99164	-0.318399	0.64412	1.67866	1.88515
MARK2	-10.7169	-1.22465	-2.63006	-3.80511	-0.0966361	-0.653076
MARK3	-8.90431	-8.8448	-11.0715	-5.60768	-0.17032	0.638636
MARK4	-4.22503	-8.06502	-2.89562	-5.00718	-6.60467	-5.06045
MAST1	-1.0742	1.33712	0.456642	-0.485043	-2.13305	-2.05035
MAST2	-0.460401	-3.05815	0.335296	-0.84737	-0.152514	-1.01076
MAST3	1.86533	0.850512	-1.27707	0.986997	1.18025	1.09057
MAST4	-0.758129	1.22696	3.19184	1.02208	0.0651217	0.287309
MASTL	-1.3682	-1.24473	-1.26238	-0.697972	0.80749	0.779934
MATK	-0.942192	1.30668	0.451361	-0.3418	-3.22299	-1.05841
MAX	-0.121582	0.0779278	0.112152	-0.449722	-1.05985	-1.46766
MBD4	0.443816	0.702409	-0.174286	1.08589	0.876647	1.77491
MCM8	1.30279	0.580561	-0.226789	0.984527	0.364119	-0.0600659
MCM9	0.665241	1.05079	1.12731	1.03198	0.555682	0.157252
MDC1	0.537658	-0.175162	0.141218	0.606254	0.376963	0.540179
MDC1	-1.73841	-2.2229	-0.244129	-0.245969	-1.61077	-2.00626
MDM2	1.65768	1.81307	0.234857	0.816507	0.198683	0.348123
MDM4	0.969259	-0.0678969	-0.719066	1.16117	1.53001	0.512832
MECOM	0.684553	0.706675	-0.804238	0.366966	1.47329	0.454619
MED12	-1.34291	-0.343493	0.102774	0.409906	0.330287	1.72435
MELK	0.85441	1.45577	1.08329	-2.20533	3.82277	2.25553
MEN1	-2.94121	-0.942524	-4.99676	-4.88336	-2.38477	-1.90379
MERTK	0.77502	-0.6395	-0.536804	-1.52343	-0.915118	-1.28967
MET	-0.314924	0.0813994	1.34452	0.809819	-2.13062	0.0849072
MGMT	0.709435	0.57115	0.762357	1.83965	1.48301	1.51699
MINK1	-3.25632	-6.59162	-7.27339	-2.1078	-2.01443	-0.866532
MITF	0.87036	-0.384848	-0.111758	0.311688	0.783737	0.139255
MKNK1	1.84335	0.991588	-1.14059	1.03273	0.0685482	0.264921
MKNK2	1.02708	-0.886712	-2.36118	-0.0125237	2.28842	2.93531
MLH1	-0.0696517	-0.182714	0.345573	0.646679	1.21027	1.6661
MLH1	0.216677	0.109073	-0.462508	1.51365	-0.58152	1.58276
MLH3	-0.530435	-3.20062	-0.765944	-1.03346	-0.381866	-0.764125
MLKL	-1.21156	-1.02879	0.00629663	0.307724	-0.987158	-1.59381
MMS19	-0.0270735	0.471582	0.818865	0.952274	2.28221	2.30135
MN1	0.0419109	-1.62313	-0.365383	-0.449823	0.371869	-1.11132
MNAT1	-1.7949	-4.12421	-4.21732	-3.60744	1.83241	2.25094
MNX1	-2.26685	-9.86888	-7.95599	-4.08372	-1.21403	-2.18935
MOK	0.537923	-0.616348	-1.23556	-0.275443	0.108838	0.0253245
MOS	-0.348506	0.85173	0.554801	0.0383058	1.95015	-0.531219
MPG	0.409839	0.502287	0.577913	0.442228	-0.0220778	-1.24357
MPG	-0.216095	-0.729001	0.348235	-1.5994	-1.93129	-1.74986
MPG	-0.0844017	-1.18148	-3.30998	-0.329855	-1.45735	-2.56833
MPL	0.606877	-2.35435	-0.326973	-0.800719	-1.55696	-1.55373
MPLKIP	-1.24005	-0.519481	2.21028	-1.36075	0.694693	-1.59196
MPP1	2.48344	0.438398	0.689072	1.27193	0.162612	-1.87822
MPP2	-0.469244	-6.28025	-7.51109	-2.35173	-0.39213	-0.485418
MPP3	0.882038	-0.231584	0.359913	-0.684579	-2.26934	-2.58531
MRE11	-0.116524	-0.0396718	0.495767	0.319139	1.17895	-0.342853
MRE11A	0.675517	0.117842	0.638492	1.55189	1.9424	1.19436
MSH2	0.937649	0.662293	1.16359	1.16111	-1.27803	0.425586
MSH2	0.988967	0.527161	1.16909	1.12437	-0.329195	0.159632
MSH3	0.322965	0.368246	0.78725	0.0866247	-3.97056	-2.31087
MSH4	-0.137268	-2.60397	-0.611669	-4.55066	0.194159	-0.261435
MSH5	0.205436	0.100677	0.983139	-0.480546	1.59243	2.40972
MSH6	-0.514932	1.24344	2.16061	-0.55281	1.70154	0.468076
MSH6	0.739623	0.523416	-0.543364	0.600705	-0.885006	-3.05709
MSI2	0.482412	2.14	1.86898	1.20254	-0.838047	-1.09842
MST1R	-1.51516	1.10637	-0.874729	-0.380288	-3.22355	-3.88619
MTCP1	0.886812	-0.304315	-0.150566	0.78335	0.107742	0.649297
MTOR	-3.61299	-2.06898	-3.91984	-2.70544	0.369021	0.462029
MTOR	-0.0298742	0.914809	-0.110931	-0.390691	-0.63541	-0.893496
MUS81	-1.20673	1.37771	1.64989	-0.0564903	1.11545	0.722621
MUS81	-0.138618	-0.140047	0.0846562	-0.054495	0.285663	0.0539548
MUSK	-2.39147	-3.24897	-6.04667	-2.92809	-0.936664	-2.13398
MUTYH	1.53077	0.018516	-0.021991	1.30078	0.871949	0.453916
MUTYH	1.41384	0.581435	0.229149	1.30422	0.420301	-0.777254
MVK	0.105771	0.795869	0.257086	0.00269819	1.66909	1.29546
MYB	0.52172	2.2476	0.29685	1.16806	1.51427	2.2154
MYC	-3.17161	2.47215	0.099764	-1.32	1.36544	2.29809
MYCL	0.429002	-3.34151	0.0383188	-0.929224	-0.121389	0.481491
MYCN	0.222687	1.31879	0.621803	0.576624	0.923915	0.785069
MYLK	1.42434	-0.785391	-1.19024	1.57244	0.894243	1.26094
MYLK2	-0.539112	-7.79401	-11.1607	-3.1793	0.160437	0.173122
MYLK3	1.67473	-0.813421	-1.05231	1.30049	1.55151	0.754564
MYLK4	-1.09547	0.130684	0.306365	-0.949265	0.105615	0.880643
MYO3A	0.89518	-0.191474	-1.61464	0.298029	-0.748599	0.567233
MYO3A	1.27304	0.455352	0.615406	0.850083	-0.529369	-0.329914
MYO3B	1.37991	-0.947338	-2.38396	0.54762	-1.33482	0.120268
MYO3B	1.06558	0.575556	0.560375	0.437874	0.203131	0.119923
N4BP2	-1.15905	1.37446	-0.183378	0.510335	-0.906301	0.224436
N4BP2L1	0.920592	0.0391051	1.39631	0.739239	-0.212192	0.509723
NABP2	-0.809471	0.331836	0.723037	0.332885	0.857056	0.501289
NADK	-0.634795	-3.31282	-2.17956	-0.368626	-1.02659	-1.39776
NAGK	-4.22703	-4.22303	-8.04846	-2.73882	0.805341	0.727373
NAXD	-4.29772	-3.18201	-6.10263	-3.05698	-5.77917	-1.01044
NBN	0.651134	0.419013	0.165206	-1.40764	1.71456	0.757194
NBN	0.913833	0.302318	-0.62481	0.0598726	0.0352015	-0.453915
NCBP3	1.09265	0.733114	1.57609	1.07712	-1.14208	0.656481
NCOA1	0.59548	0.328047	0.372865	0.500393	-1.32594	0.520843
NCOA2	0.243445	0.513335	0.53542	0.290615	-0.938703	0.346886
NCOA4	-1.05517	-3.03546	-1.08267	-4.30819	-2.94417	-4.02614
NDRG1	-6.93038	-11.1823	-16.1641	-5.88121	-0.604774	-0.981021
NEIL1	0.61644	-0.702865	-0.105921	0.146744	1.34957	1.71594
NEIL2	0.697098	0.403766	1.02234	-0.993943	1.03405	0.218329
NEIL3	2.02607	-0.480263	-0.344435	1.4932	1.32596	2.28352
NEK1	-1.29104	-0.643568	-2.99353	-0.761193	-3.60788	-1.99934
NEK10	1.79513	-3.50488	-6.31521	0.452931	0.821699	1.16722
NEK11	0.0183352	-0.600933	0.520823	-0.595577	0.880918	0.249204
NEK2	-1.92028	1.57099	0.573926	-1.4454	-2.85069	-1.97876
NEK3	-0.568382	-1.04003	1.81641	-0.685451	1.18248	-0.0748921
NEK4	0.521328	1.72139	-1.40777	0.416082	0.270586	0.17439
NEK5	2.27707	1.41617	-2.45466	1.46462	1.60845	1.41847
NEK6	1.29962	1.78666	0.118817	1.45767	2.07556	0.931513
NEK7	0.257884	-0.0315854	-0.0709874	-2.88637	0.197276	-0.052549
NEK8	-1.48139	-2.28885	-1.45604	-2.83948	-4.81866	-2.16767
NEK9	1.36207	2.12272	1.39748	1.14523	-0.596884	-0.118574
NF1	-1.52268	1.28415	-0.17324	-0.96554	-1.5289	-2.36549
NF2	0.126269	0.741353	0.633673	0.534764	1.01708	0.982183
NFE2L2	-0.234706	-0.0730723	-0.855518	-1.30655	-1.32303	-2.28014
NFIB	-1.53184	1.55201	2.31511	-0.145783	-2.7913	-0.95832
NFKB2	-0.129085	0.275613	-2.14651	0.703957	0.680127	-0.681002
NHEJ1	0.254697	0.385169	1.09077	1.29988	-0.329466	-0.12789
NIM1K	0.291234	2.59176	-0.355224	1.27312	2.11284	2.04795
NIN	0.00368082	-0.880639	0.833446	0.494396	-0.564079	0.284901
NKX2-1	-0.79787	-1.36079	-1.4519	-1.11747	1.73676	1.73318
NLK	-1.19962	-6.0594	-2.79944	-2.08763	0.279256	-0.704258
NME1	1.79076	0.734176	0.0557051	1.53728	1.34547	1.55643
NME2	0.106449	0.289965	0.658537	0.725755	1.43003	2.29483
NME3	-1.86502	0.339615	0.500857	-0.598567	-1.72131	-1.89951
NME4	-1.45224	0.871602	0.426054	0.21238	0.183682	0.803459
NME5	2.39897	-0.86518	-3.15376	0.447621	0.534156	-0.395739
NME6	-1.22082	-10.3067	0.980682	-2.37391	-3.98614	-3.76249
NME7	1.17657	0.838857	-0.637979	1.517	1.36817	1.48838
NONO	-3.22632	-3.18156	-1.24358	-2.65434	0.331489	-0.471254
NOTCH1	0.962256	1.841	0.875963	1.53613	1.51563	1.42904
NOTCH2	0.952747	0.801975	0.427818	0.96219	-0.61587	0.201286
NPM1	1.05815	2.31689	0.973736	1.46033	1.45606	2.2993
NPR2	2.24017	0.129908	-1.63652	1.9468	1.84151	2.52978
NR4A3	1.01835	-2.30216	-1.26968	-0.357876	-0.93113	-0.718672
NRAS	0.545775	1.7121	-0.112771	1.29591	2.27107	1.37789
NRBP1	-3.64006	0.116217	0.499511	-0.58956	-3.11161	-1.88287
NRBP2	-0.216551	0.379398	1.20164	0.684643	-0.190084	0.230258
NRK	-0.887636	0.00969325	0.870797	-0.294871	-3.34115	-3.19107
NSD1	0.199426	0.472503	-0.567899	0.413944	0.14738	0.0479425
NSUN3	1.26234	-0.359401	-1.52313	-0.199066	0.453965	-0.138726
NT5C2	1.55367	1.77241	0.640185	2.11024	1.21967	0.842876
NTHL1	-0.882658	-2.252	-0.862084	-2.29556	0.0198905	0.998548
NTRK1	-0.38016	0.586944	2.32728	0.241284	-1.52393	-1.58994
NTRK2	1.49183	0.520901	0.0658264	1.37878	0.43897	-1.04352
NTRK3	1.72456	0.849396	0.482465	1.65989	2.16321	-0.142065
NUAK1	0.999415	0.725624	-0.281957	0.0736938	-0.397543	-0.591
NUAK2	-7.4545	-6.99508	-5.67269	-5.31023	1.03071	0.373853
NUCKS1	1.13409	-0.0627227	-1.32137	1.62787	1.71458	2.01642
NUDT1	-4.47067	-3.45618	-2.37154	-2.89475	0.0950362	0.62196
NUMA1	-2.64641	-6.74199	-3.22912	-2.06077	-0.0409748	-1.18895
NUP62	-5.19249	2.73176	2.28242	-2.4377	-0.990935	-0.0914082
NUTM1	0.984228	2.11825	1.1982	1.93471	0.606995	1.00916
NUTM2A	-3.72726	-3.8453	-0.958385	-1.58102	-1.42155	-1.21821
NXT1	0.619688	0.516984	0.918462	0.141875	-0.632175	-1.41886
NXT2	-0.688868	1.10018	1.003	-0.0972142	-0.477252	-0.169593
OGG1	0.24343	0.591535	0.213505	-1.368	-0.00429362	-0.103774
OMD	0.793427	1.32469	-0.428449	0.673841	0.0223796	-1.82071
OXSR1	0.875799	1.22701	-0.411531	1.00786	0.868323	0.46999
P2RY8	-1.45883	-1.65588	-1.22432	0.00615438	-1.18958	-1.57605
PACSIN1	0.89324	1.39624	-0.354609	1.6316	1.59108	1.60277
PAFAH1B2	-0.452379	-2.94001	-1.28702	-0.913221	-2.3475	-1.3935
PAK1	-2.97063	1.16043	8.58727	-3.06001	-3.88112	-2.7008
PAK2	0.62748	0.55859	0.176047	0.388098	0.0533817	0.539081
PAK3	-2.4685	0.104057	2.279	-1.1168	1.35188	1.66682
PAK4	-5.98038	-0.153545	0.843873	-1.57572	-1.4524	-1.64699
PAK6	-4.00777	4.59446	5.43377	-1.99	1.52337	0.631872
PAK7	-0.434234	0.300009	1.0858	0.228089	-0.522905	0.382871
PALB2	-3.66959	-3.73828	-5.79788	-1.95895	1.27024	0.673508
PANK1	1.87937	1.5265	-1.84422	1.5024	0.594534	0.799548
PANK2	1.13657	0.914237	0.524757	1.12971	0.341454	-0.154476
PANK3	1.30494	0.73707	0.497909	0.987395	1.55475	1.17217
PANK4	-9.41044	-0.158289	-0.704878	-3.6618	-0.459465	0.525072
PAPSS1	1.18924	0.796923	-1.41044	1.14283	-0.0819804	-0.701061
PAPSS2	0.111344	-1.71898	-1.97569	-0.0500216	1.00899	2.26362
PARP1	1.23508	0.269977	-0.0506076	1.66739	-0.578399	0.652974
PARP1	0.844395	0.307688	-0.523109	0.939568	-1.44412	0.0884665
PARP2	0.908893	-0.36198	-0.334057	0.815328	-0.0178088	0.834215
PASK	0.717768	-0.190229	-1.32547	-1.58825	-0.393805	0.768327
PATZ1	0.0851582	-2.04623	-2.02161	-0.335954	-1.25236	-1.38103
PAX3	0.0266719	1.60854	1.19833	0.469638	-1.382	0.160359
PAX7	-0.725199	0.0457721	-0.687488	-1.66821	-0.568774	-0.108283
PAX8	-1.0171	-0.881271	-2.28146	0.0597418	1.61026	1.7343
PAXIP1	0.71291	-0.308643	-0.886294	0.217476	-0.336888	-0.701825
PBK	0.130304	-0.0574348	0.896181	0.688031	-1.23346	-1.20716
PBRM1	0.799851	1.21386	1.14784	1.23235	0.159532	-0.449125
PCK1	-1.77467	-7.80593	1.88232	-0.912617	-1.22212	-0.0973263
PCK2	0.759211	0.333106	0.407558	1.66883	1.16385	2.47808
PCM1	0.461308	1.61951	1.40587	0.150784	-0.641088	-1.24206
PCNA	-5.12452	-2.61009	0.836756	-2.57257	-1.12557	-0.81685
PCSK7	0.67081	-3.78525	-6.2893	-0.851074	-1.02461	-1.36107
PDCD1LG2	-1.68884	-6.95549	-9.20853	-0.521629	-0.869433	-1.94287
PDGFB	0.83182	1.29685	2.39328	0.0472653	-1.28329	-2.08473
PDGFRA	-1.29009	0.804337	2.78475	-0.220662	1.28007	1.79144
PDGFRB	-2.63359	-6.88723	-7.33989	-2.47763	-1.71667	-1.49847
PDGFRL	1.23049	-2.74282	-3.90703	0.321678	0.493097	-1.16506
PDIK1L	1.31122	1.93089	-0.649562	1.09273	1.30439	0.700819
PDK1	1.01727	0.689559	-0.59829	0.600045	1.75759	1.58033
PDK2	0.697391	-2.50584	-2.84375	-2.47851	0.68157	1.48692
PDK3	1.47135	0.531403	0.425423	0.644313	-0.807374	-0.952635
PDK4	-2.14207	-3.6534	1.36149	-0.849429	-1.24422	-1.54935
PDPK1	0.213861	-0.356905	-1.9425	0.867653	-1.06625	0.101656
PDXK	-0.793548	3.01451	1.01098	1.2597	1.34279	1.98224
PEAK1	-1.17382	-0.471902	-1.82095	-1.9333	0.39107	-0.660441
PER1	1.1019	-0.0631688	-1.50527	-0.143497	-1.37372	-2.30834
PFKFB1	-4.52014	-6.27757	-3.01994	-4.45766	0.76185	0.217102
PFKFB2	-0.273549	1.18201	0.298159	0.940033	0.250434	0.968521
PFKFB3	-0.183532	-5.93687	-1.27685	-3.95731	-0.944123	-0.999471
PFKFB4	-0.224119	-2.05192	-0.694092	-1.11401	0.859451	-0.120723
PFKL	1.08966	0.716924	-0.619632	1.05329	1.67423	1.28754
PFKM	0.652164	0.35099	-0.444355	0.881033	0.163792	0.749982
PFKP	-3.4716	1.90806	1.82198	-0.971476	1.0702	0.683662
PGK1	-5.32468	3.8432	0.850959	-2.79059	2.6638	3.71659
PGK2	1.38713	0.134467	-1.34935	1.10797	0.811536	-1.2025
PHF6	0.497472	0.298065	0.731669	1.07362	-0.236646	1.07512
PHKA1	0.703834	0.845501	0.759969	1.70154	2.17629	1.37411
PHKA2	2.17534	1.46436	-2.35548	0.859982	0.834387	0.0904745
PHKB	2.27624	2.13471	0.163855	1.57666	0.686312	0.719103
PHKG1	-0.205222	1.65594	0.616187	0.453409	0.583662	1.20331
PHKG2	1.47591	-1.30953	-0.484251	0.66065	-1.19424	-0.470798
PHOX2B	0.843732	-0.548917	-1.43982	0.846096	0.734744	1.71214
PI4K2A	0.827774	0.44724	-0.738807	0.51888	1.06799	0.683805
PI4K2B	-0.0651998	-1.70977	-0.554028	-2.00253	-2.35952	-2.33464
PI4KA	-0.0182326	-0.809468	-3.78422	-1.67992	-2.17491	-2.23961
PI4KB	0.495314	2.00473	-0.00346229	0.119336	1.2958	-0.0903406
PICALM	1.43732	1.9711	1.2242	1.96587	1.1336	1.2818
PIF1	-0.618958	-3.14965	-0.0591688	-0.815351	-1.50229	-1.12765
PIK3C2A	-9.81609	-2.42448	-1.21556	-4.77343	-0.75627	0.131002
PIK3C2B	-1.27582	-2.353	1.95377	0.163813	-2.53534	-1.04985
PIK3C2G	-7.09333	0.517021	4.46633	-3.03194	0.520072	0.897058
PIK3C3	-0.582338	-3.43658	0.461433	-1.66131	-4.7878	-4.92942
PIK3CA	2.0034	-1.09632	-1.80025	1.31119	0.71017	1.41894
PIK3CB	0.438131	0.64897	0.776906	0.927237	0.886575	0.397421
PIK3CD	0.568873	0.376409	0.81151	1.19511	0.514774	0.702949
PIK3CG	-1.77751	-0.286795	0.186561	-1.09696	1.8891	2.06334
PIK3R1	1.27686	0.0443475	-2.42351	2.11631	2.14851	2.41923
PIK3R1	1.23606	0.572182	-0.988365	1.87681	1.46195	1.5169
PIK3R2	0.754801	0.126973	1.76436	1.14576	2.15361	1.7035
PIK3R3	0.32902	0.617011	0.582953	0.316096	-0.557011	-1.09043
PIK3R4	-3.41877	-3.33741	-3.33186	-1.85317	1.58178	1.44526
PIK3R5	0.667987	0.466404	-1.72304	-1.19165	-1.96913	-2.32701
PIKFYVE	-0.394928	-1.2497	-0.0525803	0.0611379	1.26789	1.36538
PIM1	0.91899	1.68494	2.74362	0.19644	-0.182715	0.0822586
PIM2	-3.88313	-7.26874	-11.2602	-3.8652	-0.321952	-0.451872
PIM3	0.354254	0.375701	-0.181784	-0.649998	-0.901894	-0.759433
PINK1	-4.97893	-9.68874	-11.2405	-4.89657	-0.828093	-0.477528
PIP4K2A	1.41301	1.0935	-1.81283	1.25649	2.1967	0.97127
PIP4K2B	-0.689858	-0.339401	-0.467685	-1.20355	-0.601516	-1.2652
PIP4K2C	0.93263	3.26813	0.74524	1.54046	-0.547775	0.0377693
PIP5K1A	-0.904582	-1.4062	1.29043	-0.728527	-0.177036	0.677172
PIP5K1B	-1.30213	-2.14252	-0.133075	-1.28116	0.470241	-0.324567
PIP5K1C	0.774807	1.02902	0.520988	1.12335	3.13882	3.12498
PIP5KL1	0.0154271	-2.02971	-1.64055	-0.109252	1.27279	1.18504
PKDCC	-0.305196	0.988188	-0.529391	-1.2927	-3.12367	-2.98755
PKIA	0.897226	0.662526	0.662456	1.15425	0.404932	-0.302356
PKIB	-4.3495	-6.77653	2.37969	-2.51213	-3.6501	-3.27524
PKLR	-0.201845	0.995369	0.232488	0.61644	-2.71561	0.344264
PKM	-1.85973	2.02192	3.89445	-0.113111	-0.700001	-1.72635
PKMYT1	0.852498	0.280485	0.518545	0.851418	2.1711	2.70154
PKN1	1.61599	1.26621	-0.449177	1.45386	1.63951	0.788004
PKN2	-1.99712	0.69302	1.04333	-1.01835	0.143385	0.584752
PKN3	0.148127	1.31641	0.823014	0.752106	0.350361	0.0593443
PLAG1	-0.810647	-2.02805	0.109667	-1.33507	-3.43029	-3.35407
PLK1	-10.4676	-2.07226	-2.39469	-4.22026	0.338491	1.85203
PLK1	-11.166	-0.805543	0.338267	-4.99334	-1.16169	0.370345
PLK1	-10.732	-2.99693	-2.55226	-6.05463	-1.7104	-0.299131
PLK1	-11.7717	-0.831482	-1.25978	-4.87627	0.0687898	-0.572904
PLK2	0.000196047	0.410302	-0.0356389	0.733371	0.889827	0.963331
PLK3	-1.59388	-1.38288	1.30808	-1.31254	0.104958	0.547375
PLK4	-1.57285	-0.34133	-0.669004	-2.3582	2.02073	1.21462
PML	-0.677546	-0.298256	-0.0087306	0.13331	0.72845	-0.474632
PMS1	0.746157	-0.0223598	-0.959018	0.435995	1.88442	2.83153
PMS1	0.180636	-0.0205206	0.0272036	1.15815	0.346487	0.919392
PMS2	-1.49445	-2.52446	0.177346	-3.3453	-0.278988	-0.0285612
PMS2	-1.88293	-1.06603	-0.913533	-3.76273	0.715646	-0.413304
PMVK	-1.73748	-0.168771	2.1023	-1.2786	1.7146	1.10978
PNCK	-0.857873	-1.55184	0.851431	-0.0846246	-1.56926	-0.648008
PNKP	-2.17079	-6.00958	-8.32688	-2.94756	1.1549	1.04458
PNKP	-1.8616	-0.990983	-1.14578	-2.34395	-1.6914	-0.439961
POLA1	-6.4157	-1.29146	0.120213	-3.77399	-2.21389	-0.257018
POLB	-0.0137985	-2.04291	1.95406	-0.394021	-1.11792	0.036944
POLD1	0.039546	-0.113157	0.449073	0.156614	0.302488	1.61565
POLE	-3.21439	-2.96117	0.670872	-2.52778	-2.34037	-0.925095
POLG	1.23318	-0.53516	0.647792	1.55325	-2.02239	0.913052
POLH	-1.00651	-2.71939	-3.39794	-1.77006	-6.47315	-4.90491
POLI	0.712695	-0.157833	1.35128	1.28388	-0.225122	-0.225338
POLK	-3.73662	-0.12454	2.09439	-2.50694	-2.22969	-0.725653
POLL	-1.7038	1.34548	1.55698	0.179396	0.402462	2.46157
POLM	-0.563866	-1.10161	1.97194	-2.62213	0.579474	0.63766
POLN	-0.192232	-1.26245	2.2195	-0.587324	-0.502236	-0.32435
POLQ	0.151213	0.0324343	0.273951	0.927416	0.355234	-0.432749
POLQ	1.0609	1.22572	0.677373	0.394481	0.0464025	-1.0612
POMK	-0.558884	3.60509	5.21717	-0.21692	-0.445114	-1.11997
POT1	-0.404658	-8.29662	-3.86663	-1.37331	-5.20961	-2.9992
POU2AF1	0.960211	2.00471	-0.0371203	1.41021	1.51585	-1.02042
POU5F1	0.817549	-0.528737	-1.20001	-0.248999	-0.430428	-1.67797
PPARG	1.09864	1.8277	1.39272	1.1575	0.969389	2.67174
PPM1D	0.579473	-1.33331	-1.30232	-0.19873	-0.221483	-1.54433
PPP1R10	-1.57134	-2.2928	0.535859	-1.11943	-1.86871	-2.02418
PPP2R1A	1.24576	2.34335	2.1959	0.911964	0.776906	-1.26323
PRCC	0.52447	2.60518	2.80098	1.66475	0.572817	0.867183
PRDM1	-2.69762	2.80483	3.42105	-0.481276	-0.71498	-0.350048
PRDM16	0.150435	0.388275	-1.13417	0.643315	1.18411	1.12162
PRF1	0.925144	1.62219	0.966457	1.61891	1.65572	1.98573
PRKAA1	1.81067	0.958969	-0.909781	1.93615	1.2901	1.80288
PRKAA2	1.80761	-0.39945	-1.10434	-0.477609	-0.422535	-0.663173
PRKAB1	-6.62249	-1.67653	-4.65628	-7.27656	-1.00706	-0.0453707
PRKAB2	-1.11436	-1.14852	1.6835	-0.871141	1.50044	0.676231
PRKACA	0.484271	-0.561266	-1.39483	-0.365409	-2.20134	-2.06937
PRKACB	-0.846873	3.1262	2.8519	0.686142	-3.01823	-0.669832
PRKACG	-0.109594	0.0746013	-1.12706	-0.320625	-1.1236	-0.234345
PRKAG1	-0.355334	-1.01959	-2.03961	-0.479801	0.175993	-0.662166
PRKAG2	1.29423	0.430275	0.330967	0.9893	2.73514	1.40654
PRKAG3	-5.75702	-5.03263	-4.62851	-4.12157	0.0905287	1.79194
PRKAR1A	-0.615016	-0.632307	-0.838794	-0.500999	1.25163	1.85738
PRKAR1A	-1.87616	2.15404	1.56514	-0.73642	-0.0266129	1.72625
PRKAR1B	-1.10885	-0.279579	-0.873133	-2.04242	-1.22806	-2.19499
PRKAR2A	1.43068	1.73346	-0.305718	0.930943	0.0637921	-1.87585
PRKAR2B	-1.79833	1.05503	1.53126	-0.437104	-2.5314	-1.06369
PRKCA	0.0529265	0.155039	0.677794	0.0210025	-2.99809	-1.26494
PRKCB	-1.97105	-1.19377	-1.0864	-3.15191	-0.20047	1.00122
PRKCD	0.417043	-6.84522	-1.12618	0.358773	-2.36039	-0.219288
PRKCE	-4.22097	-2.48861	1.79625	-1.6621	-0.0440204	0.912665
PRKCG	0.940638	1.4443	1.3722	1.70971	0.588262	-0.330474
PRKCH	-0.563595	-1.60058	-0.0268327	-1.80092	-0.473694	0.756407
PRKCI	1.27052	0.188273	-0.466841	0.262669	0.799705	0.118501
PRKCQ	-0.122561	0.268276	0.434213	-0.760439	0.210345	-0.098121
PRKCSH	0.126079	-0.701899	0.0638295	-0.0195555	2.22951	2.50949
PRKCZ	-2.58433	-2.12645	-1.01249	-2.11895	-2.33577	-1.04019
PRKD1	2.17978	0.0105889	-1.2944	1.78337	1.53384	1.60776
PRKD2	1.04756	1.05327	0.83268	0.679575	1.34116	0.665026
PRKD3	-2.53224	0.0772022	2.02688	-2.18904	-0.95718	-0.762635
PRKDC	-2.4404	-2.7351	0.442663	-1.55817	0.505166	2.22932
PRKDC	-2.07915	0.60267	-1.26233	-1.27112	0.935682	2.1128
PRKG1	0.151931	0.681409	0.209652	-0.154084	-0.460748	-0.0527365
PRKG2	-1.2857	-4.45619	-1.8845	-2.31732	2.13757	2.66942
PRKX	0.468933	1.10404	-1.45545	0.716692	0.686091	-0.713346
PRKY	1.26293	-1.00447	-1.97568	0.685408	-0.616307	-1.59834
PRPF4B	-4.97619	1.33498	2.05715	-3.37525	-0.940336	-0.249827
PRPS1	0.134587	0.69401	-0.0486316	-0.995136	-1.16443	-2.5588
PRPS1L1	-0.54975	0.599001	0.455584	0.535805	1.43669	-0.340451
PRPS2	0.745308	1.16344	-0.422394	1.06904	2.56797	0.526691
PRRX1	-1.46569	2.46027	2.04447	0.527102	1.30967	1.81189
PSIP1	1.36931	-0.106977	-1.43453	-0.0566551	-0.584973	-1.54044
PSKH1	1.93134	-0.451593	-0.146703	0.947237	-0.226181	-1.19883
PSKH2	-0.918669	0.292775	0.778043	-0.275237	-4.56029	-3.76629
PSTK	0.320849	-0.355039	-2.51793	-0.750424	-0.719938	0.163608
PTCH1	1.26301	0.168761	-1.79682	-0.820143	-0.674293	-2.92602
PTEN	2.43852	0.155803	0.668442	1.65799	1.16528	-1.43971
PTK2	-9.48522	-0.953141	0.99532	-2.43533	-1.35868	0.361454
PTK2B	-1.87094	-1.18972	-2.53409	-1.74479	-0.67683	-1.53024
PTK6	1.51468	2.46625	0.8451	1.60751	-0.127572	-0.278014
PTK7	-1.27301	-9.84572	-3.86881	-2.86235	-5.93191	-6.86153
PTPN11	0.996919	0.639189	0.299021	1.23617	1.83557	2.1203
PXK	0.878658	-0.000562637	-1.37237	0.380752	-4.98311	-3.84077
RAB3GAP2	-0.133927	0.609762	1.27516	0.528504	0.886429	0.811753
RABEP1	-0.143844	0.829893	-1.32422	0.691924	1.72	1.09877
RAC1	-5.67319	-3.79933	-2.19323	-3.47677	0.521887	1.46221
RAD1	-0.705084	0.670209	-0.330932	0.986936	0.204962	0.607609
RAD17	-0.24547	0.062613	-0.0664822	0.13623	-0.76824	-2.43201
RAD18	0.597335	-0.287547	-1.31837	1.25582	-0.925537	-1.9971
RAD21	-6.35151	-0.829455	-1.18323	-2.49182	-0.241293	2.12886
RAD23A	0.223558	0.30554	0.950966	0.704018	-0.753224	-1.43775
RAD23B	-3.37194	-1.64195	-5.99496	-3.40968	0.843125	1.5846
RAD50	0.41965	0.197045	0.890516	0.715169	0.757395	0.108819
RAD51	-10.4129	-0.724653	-1.17164	-4.00102	0.74772	1.15086
RAD51	-9.27792	-1.88538	-1.41538	-2.10836	-3.87236	-2.7659
RAD51B	0.160677	0.413812	0.528537	-0.351386	-0.357385	0.313948
RAD51C	-2.99632	0.00672335	-0.30138	-0.941479	-1.83443	-1.26255
RAD51D	-1.18992	1.02312	0.88128	-0.557604	-1.06392	0.431383
RAD52	-0.430856	0.684613	0.784279	-1.64205	1.27274	1.15499
RAD54B	-0.447908	0.084762	0.0192881	-1.34354	2.0133	1.54329
RAD54L	0.489359	0.463751	0.847168	1.19045	1.74976	0.132966
RAD9A	-1.10866	-2.236	1.15478	-1.13785	-3.02292	-3.28079
RAF1	0.83028	1.0436	1.60102	1.37159	2.73128	2.92736
RALGDS	0.574755	1.87041	-0.260799	1.39035	2.22965	1.59711
RANBP17	-0.0528767	0.572245	0.676776	-0.491903	-1.58119	-0.86993
RAP1GDS1	0.0427738	1.61244	0.0856501	1.09224	0.2436	-0.659835
RARA	-1.07374	-0.190456	0.340188	-0.788903	-0.0563028	1.01837
RASEF	1.86975	0.45332	0.467456	1.04202	0.601638	0.517463
RB1	2.30646	0.76672	0.238606	1.91857	1.64755	0.719063
RBBP8	0.444167	0.111982	0.448486	0.614876	1.04584	0.326226
RBBP8	-6.89045	-2.73329	-9.30957	-3.93625	-0.0139311	-2.22297
RBKS	1.09807	-0.355403	-0.159725	0.208288	0.0937703	-0.0663398
RBM15	0.511653	0.927506	0.706328	-0.503746	-0.97314	0.677732
RDM1	-1.02486	1.03327	-0.168021	1.49527	1.69507	1.76059
RECQL	-1.66887	1.29684	1.43245	0.818294	1.05843	1.99764
RECQL	0.345521	0.358636	-0.0238209	-0.138507	0.272179	-0.527606
RECQL4	-0.300215	0.729913	1.58691	-0.494389	-0.250331	0.338285
RECQL4	-0.921838	-0.784165	1.5415	-2.51352	0.278645	-1.07447
RECQL5	-1.52655	-0.750167	1.08516	-3.75686	-0.677602	0.497625
REL	-0.45566	-1.5569	-0.851372	-0.330733	-1.37659	-1.18392
RELA	-3.44239	-4.285	-7.48834	-2.59299	1.21385	1.17168
RET	-1.22747	-1.26146	1.25068	-0.650809	0.100702	-0.391357
REV1	1.33371	-0.777093	-0.111307	0.692631	-2.53639	-1.38358
REV3L	-0.526418	-0.942179	-2.45378	0.139625	-3.483	-3.62157
RFC1	0.354858	-0.428415	-2.95671	0.0782584	-1.48199	-1.57134
RFK	1.14119	3.24306	-0.602044	1.17137	-1.58223	0.716844
RHOH	-1.56644	-1.427	-1.45864	-1.86293	-0.185295	1.14295
RIF1	0.76016	-0.205962	0.416657	0.708403	0.205093	0.783311
RIOK1	0.340967	0.439178	-0.502911	0.942277	1.3643	2.12016
RIOK2	-1.17702	-2.72915	-3.09939	-0.560647	0.649862	1.60474
RIOK3	1.33982	-0.301636	0.391704	1.54775	-0.63676	-1.14555
RIPK1	2.25277	2.79151	1.23971	1.24959	1.82064	0.393899
RIPK2	0.897337	1.88523	-1.1711	0.83424	1.34401	1.73041
RIPK3	0.42872	-1.25419	2.01345	0.307464	0.87189	1.57465
RIPK4	1.66347	3.72066	1.53789	0.932764	2.05198	1.66708
RMI1	-0.836242	-0.146719	0.284972	-0.892411	-0.0573282	-0.700516
RMI2	0.876628	-0.842172	-1.17616	0.529723	0.403943	0.968406
RNASEL	2.89343	1.89887	-0.505485	1.86411	-0.135902	0.25825
RNF43	-1.31373	-6.41636	-5.05373	-2.47316	-2.12892	-1.41583
ROCK1	0.891182	2.19347	2.69748	1.37292	-0.665684	0.288693
ROCK2	-0.326409	0.0637154	1.16604	0.269014	-2.19194	0.180311
ROR1	1.00343	-0.334217	-0.916644	0.713729	-1.30633	-2.4821
ROR2	-0.702921	1.91555	1.50316	0.823823	1.05878	-0.509997
ROS1	-8.5889	-5.79895	-8.93316	-5.47586	-0.699683	-1.76835
RPA1	-11.0426	-1.19732	1.26655	-4.27205	-0.677158	1.18683
RPA2	-6.78133	0.469027	1.08625	-3.15404	1.38382	0.115438
RPA3	-4.33939	1.54309	1.02912	-1.67242	0.925688	0.194869
RPA4	-2.16348	1.2079	0.599518	0.852429	1.63714	2.12071
RPL22	-1.01854	2.72837	2.20489	0.84426	0.688532	0.627496
RPN1	-2.03804	-13.2577	-5.28648	-2.43077	-2.49443	-2.54158
RPS25	-1.3091	-0.408035	0.317141	-0.34517	-0.643648	0.432507
RPS6KA1	-0.613899	-5.23978	-0.413005	-0.686862	-4.35837	-1.77014
RPS6KA2	-3.28173	-4.39974	-2.81223	-4.37495	0.841415	1.37849
RPS6KA3	-1.1757	1.45321	2.52844	0.110233	-3.71324	-2.7181
RPS6KA4	-3.38059	0.115908	2.6965	-1.49513	-1.39642	-1.83177
RPS6KA5	-1.68864	-0.135765	-0.250571	-0.746405	1.63235	1.45973
RPS6KA6	1.50637	0.782922	-1.0911	1.56725	1.63206	1.31195
RPS6KB1	-1.86254	-0.0387897	-1.52894	-0.103601	-1.50883	1.15401
RPS6KB2	1.55062	1.79082	-0.933403	0.932756	1.21753	-0.259293
RPS6KC1	0.492317	0.523319	1.26212	0.706558	-0.577773	-1.55409
RPS6KL1	-1.04136	-0.478826	-1.68482	-1.38481	0.611914	0.728177
RRM2B	0.374094	-0.106874	0.196356	1.02482	-0.551523	0.733644
RTEL1	-1.79948	-2.15691	1.2886	-0.739665	-1.88112	-1.06813
RUNX1	-2.28134	-3.82258	-3.5847	-4.4905	1.89193	0.806999
RYK	-11.8943	11.4718	7.83414	-1.6747	-4.6633	-3.88919
SBDS	1.16195	0.322102	-1.01168	0.888893	2.05333	0.652391
SBK1	0.654737	-0.0803941	-0.473892	-0.226589	1.09539	0.957789
SCYL1	0.779215	0.418896	-0.15615	1.46503	2.60953	2.86135
SCYL3	-0.556362	0.340454	0.779449	0.0660374	1.43499	1.13541
SDC4	-0.642162	-1.59541	0.238629	-0.613493	0.515168	0.58908
SDHAF2	0.15738	-4.8519	-3.31332	0.0854727	-1.85426	-3.26085
SDHB	0.230584	0.330094	-0.994534	0.0862754	-0.0466472	-0.888567
SDHC	-1.94892	0.19496	-0.423078	-2.82164	0.318781	0.653303
SDHD	-2.84754	1.08969	-2.35292	-4.31672	-0.276502	-0.376432
SEC11A	-0.398094	-0.816487	1.15526	-0.326726	-2.99855	-0.244078
SEC11C	0.736898	0.389271	-1.08794	0.655611	0.306491	-0.176329
SEC61B	-7.81276	-0.709842	-0.428663	-2.4405	0.428691	-0.138873
SECISBP2	0.870197	0.173907	-0.934994	0.830939	0.612442	0.574265
SETBP1	-0.344153	-2.99167	-1.18784	-0.437964	-3.58913	-1.35988
SETD2	-0.189591	-2.70259	-0.673762	-1.03786	-0.524872	-0.60506
SETMAR	-0.634114	-0.855844	1.52244	-0.257129	-5.47554	-3.3658
SF3B1	-11.8582	-8.64384	-3.56837	-6.20299	-0.997522	0.885708
SFPQ	-5.23842	-0.85085	1.64597	-3.43808	-1.44392	0.0287786
SGK1	-0.557941	1.18137	0.39117	1.32323	1.19674	2.16093
SGK2	0.838586	1.82523	-0.114939	1.03543	0.2261	-0.304518
SGK223	-0.762023	-4.15771	-3.21543	-2.11407	-2.6926	-1.9882
SGK3	1.23095	2.10283	1.8243	1.7527	1.77039	1.32143
SGK494	0.414173	-2.19894	0.353346	-0.523205	-0.0895266	-0.304187
SH2B3	0.91646	0.984342	0.343571	0.881648	0.566778	-0.0584076
SHFM1	-3.1804	-0.884998	-3.16462	-1.66741	0.688795	0.433346
SHLD1	-0.555418	0.27956	-1.09854	-0.233211	0.319734	1.14392
SHLD2	-3.29738	1.32281	1.38098	-1.06416	-6.07171	0.399104
SHPK	-0.635765	-0.361707	-1.52543	-1.08914	0.873809	0.313682
SIK1	0.368603	-0.372499	-0.64205	-0.3929	-0.951015	-3.16006
SIK2	-2.32336	-3.9649	-2.08329	-1.79426	-3.41164	-1.33806
SIK3	-0.843681	-3.66165	-2.16973	-1.24734	-0.599821	0.747003
SKAP1	0.894378	0.988805	-0.809948	0.729545	1.4152	0.519705
SLC34A2	-0.373068	-8.43577	-8.15361	-3.35052	-3.8403	-2.80373
SLC45A3	-0.608385	-3.31108	-4.74082	-1.35057	-3.04135	-0.959157
SLF1	1.07869	-1.01092	-0.493848	0.0704382	0.279715	-0.654999
SLK	0.780479	1.05765	-0.0405181	1.1014	2.64843	2.26556
SLX1A	0.166678	0.808285	1.05738	0.173165	0.207182	-0.26832
SLX1A	-0.307236	-0.186871	-0.435965	-1.78544	0.676076	-0.922987
SLX4	-2.4365	0.605927	-0.257356	-2.10083	0.0120438	-0.233311
SLX4	-3.01849	-0.498375	-2.85236	-1.6823	-0.738731	-1.56871
SMAD4	-1.52225	-0.375021	1.14164	-1.9249	-0.112414	0.195382
SMAD4	-0.617502	-1.26866	2.22008	-1.51685	-0.518399	-1.42191
SMARCA4	-0.299407	-7.94829	-0.925678	-1.07686	1.14905	0.742155
SMARCB1	-1.23549	1.51508	1.19232	-0.0536	0.267975	1.26878
SMARCE1	1.06056	0.263989	0.0507821	1.16256	1.19245	-0.251049
SMG1	-1.83396	-3.48648	-1.18272	-1.74969	-0.729118	-0.385875
SMG1	-2.44695	-2.42065	-0.192882	-1.64013	-6.02711	-2.71712
SMO	0.946743	2.04449	0.428689	1.321	2.3904	2.02518
SMUG1	0.942408	0.277754	-1.27307	0.877389	0.942478	0.0668189
SNRK	-8.73503	1.29483	1.9657	-3.17263	-0.298078	-0.289871
SNX29	1.18051	0.503705	0.494187	1.64141	-0.115544	0.519416
SOCS1	0.843477	-0.276532	-1.91004	0.82646	-0.904199	-1.16612
SOX2	-0.356463	-4.66251	-4.92467	-1.79724	0.224737	1.03748
SPECC1	0.943713	1.41316	0.305329	1.42187	0.832251	0.459144
SPEG	0.515109	-0.762547	0.759735	0.0253289	0.713067	-0.434536
SPHK1	1.61652	1.19867	-0.170404	0.680899	-1.34927	-2.45687
SPHK2	-1.9028	-2.35138	-0.345934	-0.761256	0.462039	0.250279
SPO11	0.294133	0.0392421	0.986427	0.380108	-0.63336	-0.0820198
SPRTN	-0.0162768	0.714243	-0.0549342	0.212957	0.830278	1.14294
SRC	-2.32544	-3.69776	-0.53598	-1.23749	0.784969	0.0268664
SRGAP3	1.44542	1.63414	-0.225724	1.60965	2.08666	2.04248
SRMS	-4.54097	-4.71147	0.543055	-1.98905	-1.02059	-0.437732
SRP72	-1.26335	-1.18316	-0.418743	-1.24338	-0.866685	-1.4374
SRPK1	2.06758	-0.22105	-1.79674	1.53807	1.03131	0.86867
SRPK2	1.04498	0.0703017	0.27194	0.229633	-0.349407	-0.169635
SRPK3	1.92891	0.0294978	-0.593935	1.74914	1.6651	-0.834194
SRSF2	-3.71004	-0.156558	2.66478	-1.8305	-0.596596	1.53098
SRSF3	-7.49303	-1.21633	1.33845	-3.5743	1.09743	1.35063
SS18	1.09703	1.42706	1.4333	1.41202	0.269349	-0.471149
SS18L1	0.489692	-0.793606	-0.932498	-0.276713	-0.44611	-1.1273
SSX1	-0.699983	-1.52952	-3.63666	-1.76095	-1.77567	0.584073
SSX2	0.847803	-2.20189	-5.08341	-0.248629	0.457028	0.683251
SSX4	0.602174	1.17304	0.416718	0.77611	1.07067	1.15269
STAT3	-0.156288	-1.79636	-0.620425	-0.645487	-1.52431	-1.84749
STAT5B	0.00977596	0.763433	1.32893	0.935367	-0.913006	0.346983
STIP1	0.797748	-0.0229791	-0.646826	0.752774	0.963108	1.35548
STK10	0.0496057	0.884576	1.83295	0.456556	0.927782	-0.476984
STK11	-1.37866	0.577506	-1.67327	-1.02708	-1.90999	-3.391
STK11	-2.77153	0.0547223	0.911253	-1.68056	-3.02047	-3.99352
STK16	0.480955	0.728431	0.248299	0.258756	-3.20917	-4.68711
STK17A	0.935796	0.804783	1.01753	0.273081	-0.741881	-1.41255
STK17B	-2.48204	-1.00331	1.43227	-0.948906	1.27528	0.414573
STK19	0.870047	0.367009	-0.973437	-0.764063	-1.13821	-0.158003
STK24	0.20086	-1.15662	1.42351	0.387893	-2.49071	-2.5973
STK25	1.89628	-0.969919	-2.07611	0.893601	2.02538	1.85348
STK26	-0.91503	1.56403	0.145078	0.551989	-0.158076	0.589647
STK3	0.848369	-0.759625	1.17588	0.945126	0.231551	0.565514
STK31	-6.79085	3.78941	3.09331	-0.669016	-1.92059	-2.47749
STK32A	-0.19324	0.678888	1.45785	-0.124208	-1.35341	-2.25151
STK32B	1.034	0.238964	0.853348	0.669855	1.68092	1.26521
STK32C	-1.31987	-1.02947	0.301002	-0.55959	1.62612	2.68667
STK33	-2.44339	-2.09888	-0.70412	-1.66746	-2.22199	-2.4926
STK35	-0.321817	-2.43613	-2.27449	-0.385252	0.0150301	-1.32724
STK36	0.414621	2.18256	1.89535	1.41905	-0.25128	-0.718095
STK38	-2.64907	-0.740408	0.49465	-1.48064	1.47691	0.14913
STK38L	1.17993	1.08261	1.45433	0.917275	1.32877	-0.129405
STK39	-2.46749	-0.237998	-2.89508	-2.99621	-1.22924	-0.630463
STK4	1.1001	0.944123	-0.674825	0.253177	1.7262	-0.0863699
STK40	-0.974129	-0.176519	0.439865	-1.00639	0.397524	0.486719
STKLD1	-5.49633	1.63674	2.35603	-2.25673	-1.78102	0.355268
STRADA	-2.71299	-1.15812	-0.365721	-1.85176	1.39723	1.07082
STRADB	-0.330706	-1.19152	-0.622425	-1.70527	-0.249808	3.21323
STYK1	-5.49334	-7.45063	-9.44228	-4.60439	0.646479	-0.387921
SUFU	1.11511	0.509118	0.17585	1.01833	0.344066	0.265233
SUN1	-3.33575	-0.842102	2.41234	-1.64846	-0.0781467	-0.00215796
SUZ12	0.627352	-2.65546	-1.36443	-0.305706	-0.385025	-0.438797
SYK	-4.36852	-8.55941	-8.19317	-3.85717	-0.693921	-1.1512
TAB1	1.01741	0.562396	1.12409	0.918338	2.81256	1.12213
TAF1	-1.45353	-1.60271	0.184368	-0.690159	1.60862	1.08469
TAF15	-0.25879	-0.118494	-0.249147	-0.847548	0.805953	-0.826993
TAF1L	-0.0167201	-0.852348	-1.51705	-1.19452	1.16927	2.01534
TAL1	-0.409356	1.68861	1.72167	0.830198	-0.037573	0.87549
TAOK1	-2.35332	-6.78769	-0.627724	-1.96827	-0.989691	-0.884345
TAOK2	1.80407	0.821818	-0.159923	1.51861	-0.401025	-0.564433
TAOK3	0.0193967	0.469559	-0.100111	0.173506	-0.80123	-0.179732
TBCK	0.232271	-0.362192	0.110863	0.4151	-1.69812	-0.572305
TBK1	1.2118	0.0828235	1.07448	-1.13196	-3.2086	-4.58878
TBL1XR1	0.93034	2.09988	1.31417	1.30866	-0.354351	-0.624527
TCEA1	0.0648411	0.282355	-0.637234	0.54585	0.884372	0.109484
TCF12	0.203257	-10.9002	-2.43935	-1.97371	-1.83994	-0.494452
TCF3	-0.00936802	-4.28857	-2.5341	-1.49609	-0.352985	-2.21295
TCF7L2	0.668318	-0.302477	-0.695783	0.694914	0.0493848	-2.05348
TCOF1	-0.083905	-1.05291	-0.552368	-0.00651496	-0.395247	-0.302065
TDG	0.0754946	0.250688	0.188451	0.439139	-0.0710739	-0.0971763
TDP1	0.317266	0.355925	0.3631	0.481179	1.41723	0.669042
TDP1	-0.271595	-2.10044	-3.60801	-0.766071	-2.4805	0.17769
TDP1	-1.11334	-0.0230008	-3.20726	-1.26274	-0.78156	-0.0509206
TDP2	-0.198637	0.578132	2.52399	-0.253032	0.0584543	-0.629287
TDP2	-0.48557	0.361625	2.19551	-0.511881	-2.21094	-1.26767
TEC	1.05267	0.722491	-1.32704	0.871737	1.68258	0.317603
TEK	1.24847	1.98782	-1.00483	1.2558	0.0140114	-0.111642
TERT	1.28915	0.667486	0.97165	0.423651	2.01338	0.652224
TESK1	-0.643319	0.663231	0.0812522	-1.22982	0.519139	-1.71568
TESK2	-1.2362	-1.49323	0.448239	0.445655	0.967268	1.08581
TET2	-0.182418	1.76396	0.972021	1.01683	0.960776	0.694864
TEX14	0.522525	-2.40266	-1.95377	-0.466116	-0.943803	-0.438198
TFE3	0.92228	1.85889	-0.0154782	1.52378	2.22621	2.22824
TFEB	0.943947	1.17676	0.487817	0.246649	-0.887427	0.867653
TFG	-2.22157	-6.54181	-2.70101	-2.09571	-2.54735	-2.02891
TFRC	0.271716	-1.82576	-0.96909	0.873338	0.144672	0.785927
TGFBR1	0.257637	1.39421	2.19083	0.76257	-2.49757	-2.76451
TGFBR2	0.158158	0.662972	1.2982	0.245107	-1.21436	-1.18504
TGFBR3	-0.0592927	-0.00694695	0.724015	0.0895979	0.767366	-0.0429458
THAP5	0.0516842	-1.0656	-1.15485	0.108604	-0.035314	-0.000211526
THNSL1	0.415052	1.73607	0.251415	1.29992	1.37233	1.38466
THRAP3	0.555044	0.786386	-0.0839823	0.301342	0.922279	0.74737
TIFAB	-3.73402	-6.67763	-10.7831	-1.01094	-2.22702	-3.14907
TJP2	0.0547645	-2.27721	-0.910683	-0.697956	-2.49382	-2.92553
TK2	1.1029	0.4867	0.926242	0.721838	2.57002	2.10333
TLK1	1.29248	-0.244201	-1.51972	-0.569301	-1.6236	-0.656347
TLK2	1.74594	0.973833	0.957719	1.08544	-0.829544	-0.554864
TMCO3	0.319775	0.0909277	0.782618	0.431559	-0.0283429	-0.442773
TMPO	-1.26334	-5.37757	-2.33908	-2.19266	-2.77	-1.13792
TMPRSS2	1.52539	1.22952	0.297072	0.888337	0.183442	1.01748
TNFAIP3	0.825374	-1.21295	0.254834	0.101405	-2.09438	-0.219842
TNFRSF14	0.404889	1.5839	0.820194	1.02208	-0.281648	-0.892595
TNFRSF17	-1.69678	1.24239	1.20284	-1.18886	-0.00149572	-0.427141
TNIK	0.188873	0.10404	1.40218	0.787832	-0.154637	0.394139
TNK1	-2.84838	-2.02146	-0.203983	-1.50887	1.40143	1.14909
TNK2	-0.891666	-2.10497	-3.86198	-0.457335	0.330248	1.65075
TNKS	1.67188	-0.180627	-0.492433	1.47199	0.433911	1.33237
TNKS	1.47178	-0.204854	-0.79924	1.09926	1.54341	1.18897
TNKS2	1.7636	-0.0306814	-0.0617077	2.11561	2.00853	1.15579
TNKS2	1.99319	2.17087	1.01912	2.29187	0.63613	0.793708
TNNI3K	2.43699	2.43902	-3.1265	1.89606	2.2245	2.15747
TOP1	0.730881	0.447694	0.139532	1.09398	1.7785	2.04034
TOPBP1	-9.10418	-2.43093	0.34075	-4.24084	-0.659325	0.678026
TP53	-0.568646	0.202841	1.17843	-1.43871	1.23907	1.04837
TP53	-0.747512	-0.0632976	0.346916	-1.03298	-1.9906	-2.68551
TP53BP1	-0.366468	0.454477	0.399942	0.524597	-0.466812	-1.0991
TP53RK	1.23297	-0.408662	-0.0923364	0.397144	-0.0952193	-0.685918
TPD52L3	2.21581	2.98461	1.94909	2.31829	1.01768	1.47631
TPK1	-8.36923	-2.15355	-1.59939	-4.21138	0.105912	1.19919
TPM3	-0.404072	-3.54287	0.211444	0.0330393	-0.625224	0.163257
TPR	0.405716	0.650774	1.31174	0.00220709	1.32377	0.209004
TPR	0.479456	1.06926	1.12073	0.48082	1.03929	-0.547453
TRAF7	-1.2307	-5.71701	-1.18562	-1.12062	-2.90742	-2.0172
TREX1	-3.07857	-2.03153	-1.66514	-0.896421	0.0260998	-0.946693
TREX1	-3.60462	-0.202154	3.52378	-1.24924	-0.337225	-1.18943
TREX2	0.285978	-1.46157	1.65143	-0.688495	-2.3321	-2.16938
TRIB1	0.061252	-1.19569	-0.674171	0.0129513	-2.12454	-0.428287
TRIB2	-1.14139	-1.85134	0.433575	-2.20779	0.885866	1.3513
TRIB3	-2.1046	-0.369641	1.38462	0.256477	-1.74054	-1.27817
TRIM24	-3.08606	-6.76921	-5.99922	-3.08281	-0.282939	0.59681
TRIM27	1.16947	0.677975	-2.83666	0.558399	-0.826357	-1.45212
TRIM27	0.212529	0.874333	0.124532	0.671565	-1.94696	-2.3669
TRIM28	-0.529256	-0.324886	1.22184	-0.518603	-0.628776	0.245184
TRIM33	0.409472	-2.99654	-1.51201	0.0555186	-0.0709251	0.676417
TRIO	2.01802	2.57315	1.48359	1.30784	0.785173	-1.04244
TRIP11	0.593612	-2.46717	-2.04568	-1.6698	-3.68588	-2.01367
TRPM6	0.797556	1.10599	1.41026	1.20493	0.939042	0.0669133
TRPM7	0.682664	0.0193455	-0.352916	1.13463	-0.251874	1.04266
TSC1	0.329328	0.241898	-0.165756	1.69268	1.74507	1.88721
TSC2	0.891291	0.666831	1.5848	1.43173	1.63329	2.15828
TSHR	0.268368	2.45014	1.84382	1.43483	1.5037	-0.0374262
TSKS	1.76606	-0.0923815	-0.923568	1.13355	-0.266623	0.47579
TSSK1B	-1.13707	-0.400043	-5.43052	-0.399651	0.317063	-2.32992
TSSK2	-0.762969	-4.42204	-1.22804	-1.55169	-1.81943	-1.79955
TSSK3	-1.76293	-3.01546	-2.65163	-2.30439	1.28309	1.87155
TSSK4	0.218235	-0.423137	-0.723471	0.306493	-2.04841	-0.620093
TSSK6	-1.54634	-1.4772	-4.61616	-0.646739	-1.13018	-0.633426
TTBK1	-5.58746	1.02101	-0.430629	-2.22584	-1.94306	-3.21112
TTBK2	-5.42597	2.10718	0.247647	-2.54082	-2.35344	-2.26457
TTK	-9.41718	-2.89215	-3.29911	-4.97484	0.204827	2.1837
TTL	0.457096	-2.54275	0.293045	0.200392	-7.95189	-4.29159
TTN	2.00029	-0.106753	-1.24601	0.998551	0.118987	0.0884343
TWF1	2.47773	1.58261	-0.582824	1.49857	-0.566467	0.19075
TWF2	0.0879702	-0.234019	-0.585916	-2.03867	-2.66936	-3.43384
TXNDC9	-13.2378	-0.731142	-0.0683792	-4.97135	-0.410869	-0.607885
TYK2	-0.606981	-0.657938	-0.949511	-1.19301	0.0294726	-0.686377
TYRO3	-3.81043	1.64225	0.747909	-1.16462	1.92478	2.86181
U2AF1	-7.8116	2.28424	5.39839	-2.09902	0.515759	0.773172
UBE2A	-0.0292164	-0.696674	0.503616	1.33712	0.369098	1.78865
UBE2B	1.64776	-1.079	1.024	1.24307	-0.25879	0.564121
UBE2N	-1.09914	-1.98599	0.283044	-1.11798	-4.69316	-3.84165
UBE2V2	0.450892	-1.19893	-0.591817	-0.338059	-3.7988	-3.35189
UBR5	-1.75466	-8.81463	-2.93445	-4.22949	-1.96575	-0.175339
UCK1	-0.259951	0.903723	0.792073	0.669348	2.09385	1.74412
UCK2	-2.26659	-1.50294	-4.08709	-0.38096	1.64947	1.60096
UCKL1	1.84151	0.0329917	-0.494613	1.49555	1.7054	1.3066
UHMK1	0.463815	-1.00019	-3.29096	-0.00444915	-0.454437	-1.50692
ULK1	-1.11937	1.04839	1.2124	0.0304348	0.0464653	0.837215
ULK2	1.05729	1.54385	-0.331969	-0.00100643	-1.73833	-2.17087
ULK3	-1.52332	1.4189	0.359273	-0.123642	-1.3706	-2.64968
ULK4	-3.33926	-5.70617	1.28266	-2.5768	1.45234	0.898261
UNG	-4.6168	0.795405	-0.311787	-1.43236	0.361872	0.743174
USP14	0.404295	-0.00189297	0.414335	0.484805	-0.691589	-0.813542
USP6	-1.45704	-1.82016	1.61255	0.0925667	-0.628604	0.0821529
UTP20	-1.93554	0.53822	2.13367	-0.883806	-0.768815	0.523138
VHL	-0.000196047	0.122554	-1.01025	-1.44205	0.892269	-0.643314
VRK1	0.630718	-0.719519	0.825926	0.320206	-2.14541	-0.74428
VRK2	0.925408	1.06935	1.02546	1.42833	0.157745	-0.574106
VRK3	0.208636	-0.489389	1.04053	0.913631	-0.873953	0.198947
VTI1A	1.10275	1.48463	2.1399	0.557286	-2.91476	-6.64588
WAS	-1.45236	0.933131	0.555023	-1.12457	-2.89801	-0.835322
WDR91	0.500306	-0.33643	-0.53097	-0.990655	-1.00444	-1.92877
WEE1	-2.28674	-7.85824	-4.65582	-3.92074	0.514419	-1.00363
WHSC1	0.677856	-2.23897	-1.51766	0.0186588	-0.361044	-0.821412
WHSC1L1	0.0885115	-1.19954	-0.394985	0.677614	-0.745007	0.0469816
WIF1	0.785418	0.638405	-0.2423	0.485607	-0.374751	-0.237669
WNK1	0.299179	0.202105	-0.818144	-0.0418852	0.472748	1.75792
WNK2	-0.783995	-1.01708	-0.443492	-0.396316	-1.72341	-1.69232
WNK3	-0.313682	-2.17247	0.271729	-1.71101	-0.242568	0.776385
WNK4	0.165461	-1.69024	0.683656	-0.206371	-1.4291	-2.17375
WRN	-0.442184	-0.126916	0.193953	-0.546339	1.54191	0.414837
WRN	-0.324097	-0.798485	0.486041	-0.132577	0.60222	-0.148596
WRN	-1.94971	-0.527283	2.93779	-1.3524	-0.180847	-0.368535
WT1	1.28331	-0.0227996	-0.410678	-0.14358	0.950802	-0.135381
WWTR1	-4.00477	-3.08259	-1.12652	-1.06552	0.270883	0.503821
XAB2	-11.088	0.355071	0.860361	-3.79672	1.62148	2.28088
XPA	1.77989	0.571442	0.634496	2.35671	1.81347	2.54574
XPA	1.06905	0.183215	0.726624	1.98928	0.956904	2.34961
XPC	1.56188	-0.145168	-0.140411	1.8587	1.03523	1.95957
XPC	2.00821	0.46295	-0.611016	2.28701	0.95954	1.86531
XRCC1	0.703185	-0.0289096	0.260126	-0.219472	-0.981821	-2.24854
XRCC1	-0.579947	-0.177642	0.412508	-1.09157	-1.01651	-2.33986
XRCC2	-0.348457	0.229037	0.109687	0.844085	2.42661	1.99805
XRCC3	-1.13874	1.15629	1.96966	-0.392009	-0.200877	0.167536
XRCC4	-0.34964	-1.8222	0.400642	-0.790208	-0.12189	1.03909
XRCC5	-0.978638	1.02014	1.40534	0.83097	2.04045	2.34061
XRCC6	-3.13719	1.36733	0.522713	-0.695612	0.190713	-0.3862
XRCC6BP1	0.915233	0.340588	0.164821	0.914711	-1.07497	0.951995
XYLB	-0.843969	1.87546	1.83883	0.392687	-2.89745	0.0059037
YES1	0.292836	0.384632	2.52499	0.733533	0.585749	1.7181
YWHAE	-0.710932	-1.95846	-0.671476	-0.476488	-0.47917	-1.14033
ZAK	1.85967	0.434041	0.79188	1.50571	-0.977984	0.00389472
ZAP70	0.327981	-2.87411	-2.60519	-0.920325	-3.29967	-4.1922
ZBTB16	1.1006	-1.21174	-0.0730342	-1.05303	-1.49973	-1.5302
ZDHHC13	-0.251039	0.175036	1.41431	0.0812069	0.21995	0.443604
ZDHHC17	0.844797	0.297917	1.80445	0.87096	0.541499	-0.119326
ZDHHC21	1.79273	-0.806603	-1.08142	1.01227	0.486369	-0.502655
ZFR	0.845984	-0.744853	0.757621	0.259142	-1.82701	-0.328638
ZMYM2	0.651424	1.84652	0.567083	0.369579	-1.39682	-2.82082
ZNF331	-2.98121	-3.56273	0.0759848	-1.47696	-1.62766	-1.74265
ZNF384	0.17839	-0.178004	-0.0728178	0.423656	-1.4069	-0.900278
ZNF521	0.210395	-0.390566	-0.0510622	0.267733	-0.848051	0.69976
ZRSR2	0.844927	1.79157	1.92935	0.666723	1.41217	-0.335822
